# Supplementary material for: Humoral Immunogenicity and Efficacy of a Single Dose of ChAdOx1 MERS Vaccine Candidate in Dromedary Camels
Source: PubMed Central journal article supplement (PMC6841732; doi:10.1038/s41598-019-52730-4), 2019-11-08
Supplement: 41598_2019_52730_MOESM1_ESM.pdf [file 41598_2019_52730_MOESM1_ESM.pdf]

## Supplementary file

### Article Title: Humoral Immunogenicity and Efficacy of a Single Dose of ChAdOx1 MERS Vaccine

#### Candidate in Dromedary Camels

**Authors:** Naif Khalaf. Alharbi<sup>1,2\*</sup>, Ibrahim Qasim<sup>3</sup>, Abdulrahman Almasoud<sup>1</sup>, Haya A. Aljami<sup>1</sup>, Mohamed W. Alenazi<sup>1</sup>, Ali Alhafufi<sup>3</sup>, Omar S. Aldibasi<sup>4</sup>, Anwar M. Hashem<sup>5,6</sup>, Samy Kasem<sup>3,7</sup>, Raed Albrahim<sup>3</sup>, Musaad Aldubaib<sup>8</sup>, Ali Almansour<sup>3</sup>, Nigel J. Temperton<sup>9</sup>, Alexandra Kupke<sup>10,12</sup>, Stephan Becker<sup>10,12</sup>, Ali Abu-obaidah<sup>3</sup>, Ali Alkarar<sup>3</sup>, In-Kyu Yoon<sup>11</sup>, Esam Azhar<sup>13,14</sup>, Teresa Lambe<sup>15</sup>, Faisal Bayoumi<sup>3</sup>, Ali Aldowerij<sup>3</sup>, Osman H. Ibrahim<sup>3</sup>, Sarah C. Gilbert<sup>15</sup>, Hanan H. Balkhy<sup>1,2,16</sup>

#### Affiliations:

<sup>1</sup>Department of Infectious Disease Research, King Abdullah International Medical Research Center, Riyadh, Saudi Arabia

<sup>2</sup>King Saud bin Abdulaziz University for Health Sciences, Riyadh, Saudi Arabia

<sup>3</sup>Ministry of Environment, Water and Agriculture (MEWA), Riyadh, Saudi Arabia

<sup>4</sup>Department of Bioinformatics and Biostatistics, King Abdullah International Medical Research Center, Riyadh, Saudi Arabia

<sup>5</sup>Department of Medical Microbiology and Parasitology, Faculty of Medicine, King Abdulaziz University, Jeddah, Saudi Arabia

<sup>6</sup>Vaccines and Immunotherapy Unit, King Fahd Medical Research Center, King Abdulaziz University, Jeddah, Saudi Arabia

<sup>7</sup>Department of Virology, Faculty of Veterinary Medicine, Kafrelsheikh University, Kafrelsheikh, El Geish Street, 33516, Egypt

<sup>8</sup>College of Agriculture and Veterinary Medicine, Qassim University, Qassim, Saudi Arabia

<sup>9</sup>Viral Pseudotype Unit, Medway School of Pharmacy, University of Kent, Chatham, Kent, ME4 4TB, United Kingdom

<sup>10</sup>Institute of Virology, Philipps University of Marburg, Marburg, Germany

<sup>11</sup>International Vaccine Institute, Seoul, South Korea

<sup>12</sup>German Center for Infection Research, TTU Emerging Infections, Germany

<sup>13</sup>Department of Medical Laboratory Technology, Faculty of Applied Medical Sciences, King Abdulaziz University, Jeddah, Saudi Arabia

<sup>14</sup>Special Infectious Agents Unit, King Fahd Medical Research Center, King Abdulaziz University, Jeddah, Saudi Arabia

<sup>15</sup>The Jenner Institute, University of Oxford, Oxford OX3 7DQ, UK

<sup>16</sup>Department of Infection Prevention and Control, Ministry of National Guard - Health Affairs, Riyadh, Saudi Arabia

\*To whom correspondence should be addressed: [harbina2@nga.med.sa](mailto:harbina2@nga.med.sa)

## I. Supplementary Figures

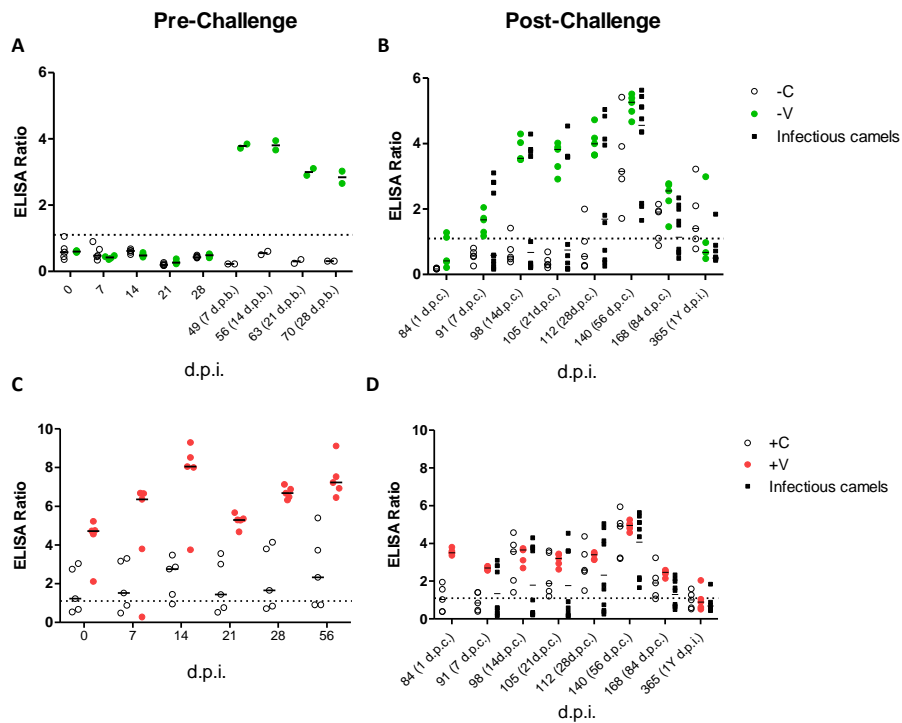

**Figure S1: Antibody immune responses in dromedaries vaccinated with ChAdOx1 MERS assessed by Euroimmun ELISA kits.**

Seronegative calves were either immunised with control injections (PBS or ChAdOx1 eGFP), group -C (open circles), or with ChAdOx1 MERS, group -V (green closed circles). Seropositive camels were either immunised with control injections (PBS or ChAdOx1 eGFP), group +C (open square), or with ChAdOx1 MERS, group +V (red closed square). Serum samples from different days post immunisation (d.p.i.) were evaluated in Euroimmun ELISA kits. Infectious camels used as a natural challenge models were also evaluated (black square). Data are plotted before the challenge (**A and C**) and after the challenge (**B and D**) with timepoints shown as d.p.i., days post boost (d.p.b) and days post challenge (d.p.c.). Y: year; +: seropositive; -: seronegative; C: control group; V: vaccinated group.

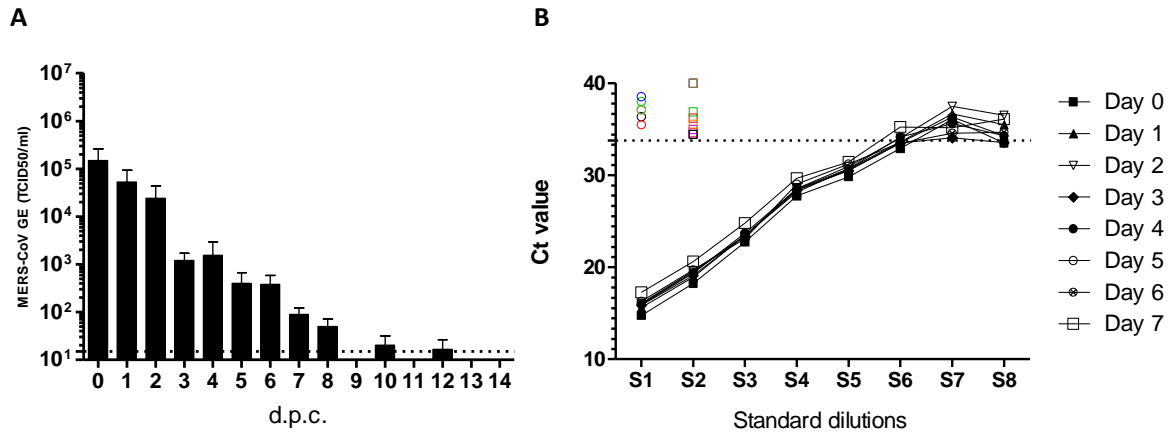

**Figure S2: Genome equivalent (TCID<sub>50</sub>/ml) titres in the MERS-CoV infectious camels.**

**A:** Virus titres in MERS-CoV infectious camels used as a natural infection model were evaluated for 14 days post challenge (d.p.c.) using standard curve based RT-qPCR assay to report MERS-CoV GE (TCID<sub>50</sub>/ml). Dotted line represents the detection limit of the assay, which is determined in graph **B**. **B:** Viral RNA from a sample with a known TCID<sub>50</sub>/ml titre was utilised to set up the standard curve in RT-qPCR to evaluate the MERS-CoV GE (TCID<sub>50</sub>/ml) titres. The detection limit of the assay was considered as the value of the last dilution before the plateau curve. Coloured circle and square symbols indicate values of negative samples from healthy camel and human, respectively.

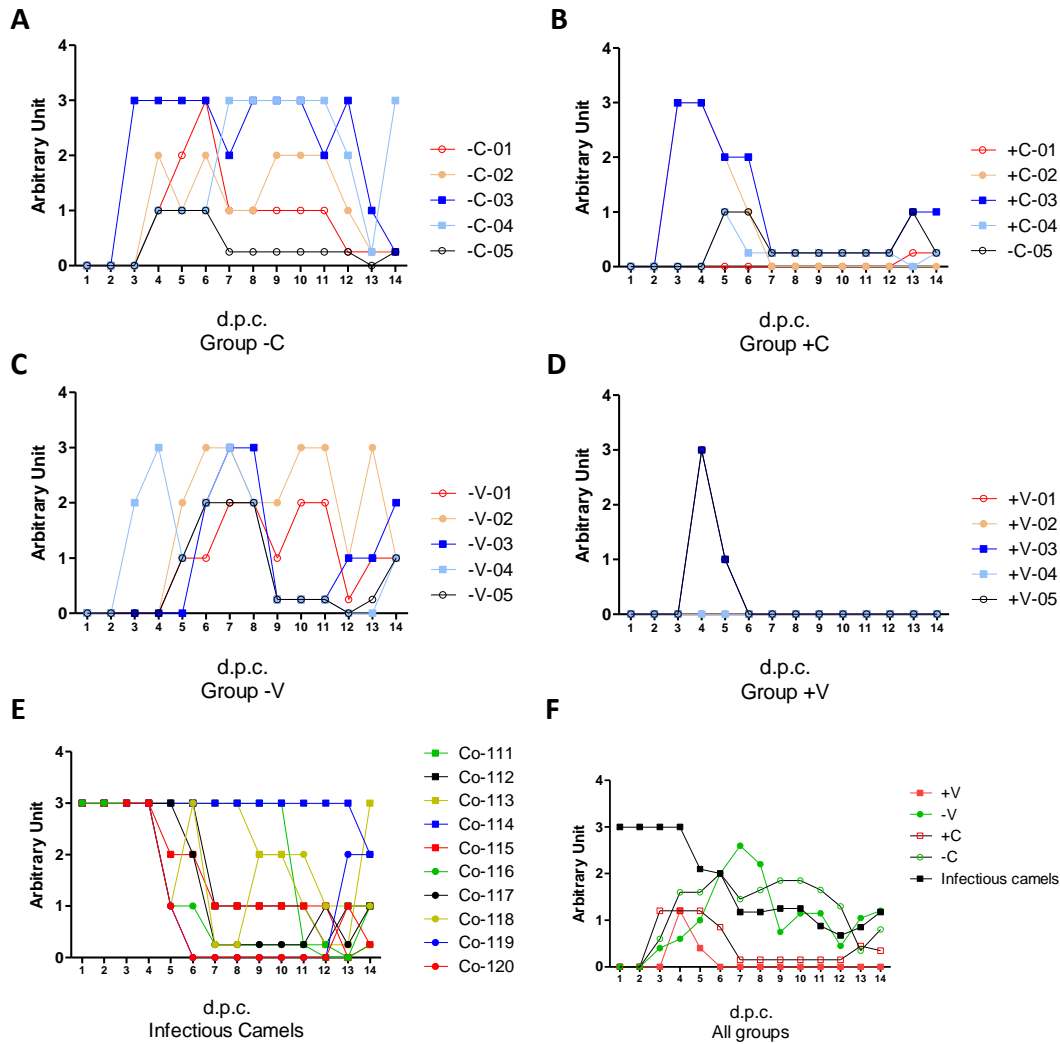

**Figure S3: Severity and abundance of nasal discharge post natural infection challenge.**

**A-D:** Scores of nasal discharge are reported for the twenty camels in all experimental groups of -C, -V, +C, and +V for 14 d.p.c. **E:** scores for the ten naturally infectious camels (used as a challenge model). **F:** average score per group. The scores were recorded as arbitrary units of 0 (normal), 0.25 (recovered), 1 (mild), 2 (moderate), or 3 (severe) depending on the nasal discharge abundance. Statistical analysis on areas under the curve of these scores is presented in Figure 3. +: seropositive; -: seronegative; C: control group; V: vaccinated group; Co-: co-housed camel.

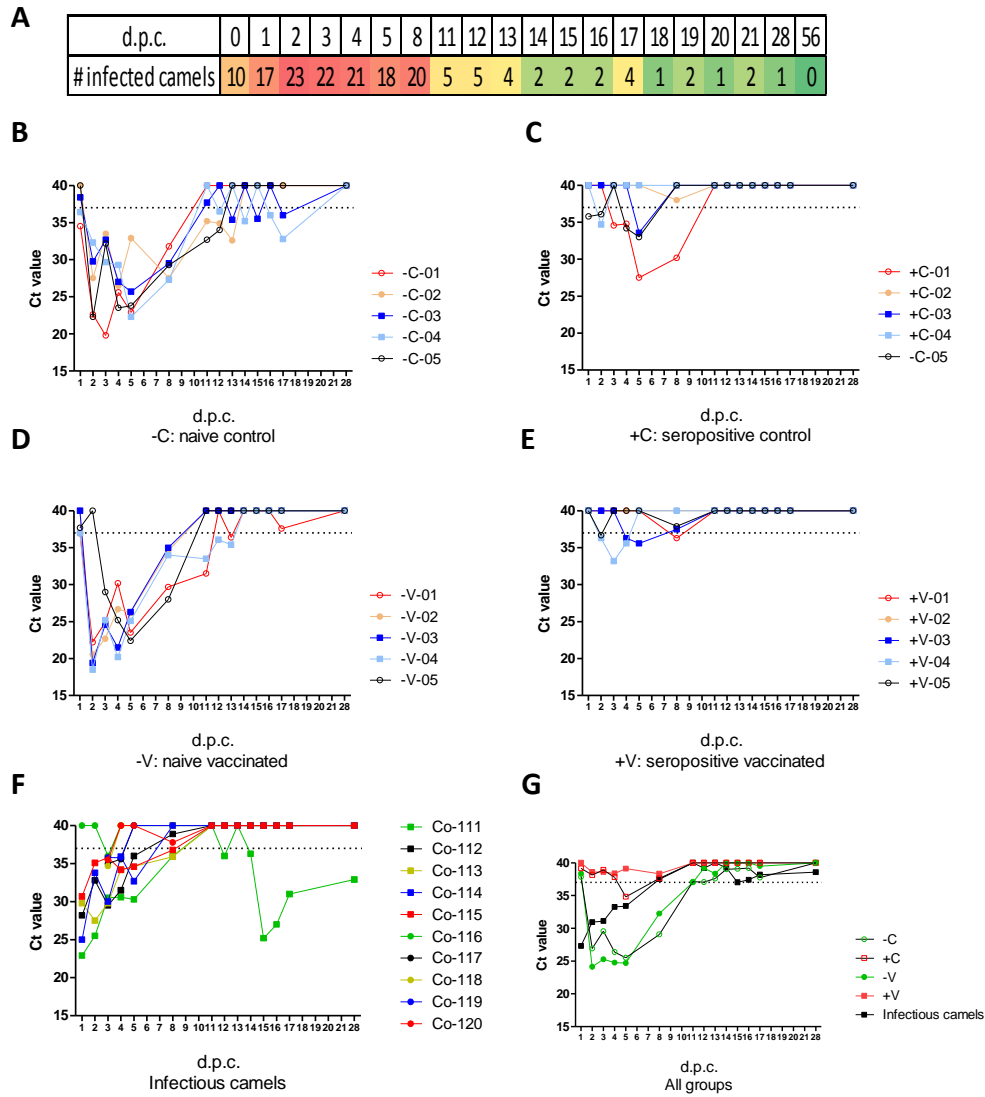

**Figure S4: Efficacy of ChAdOx1 MERS in dromedaries based on RT-qPCR assay.**

**A:** Camels in all groups (total  $n=20$ ) were co-housed with naturally infectious camels ( $n=10$ ), and the number of infected camels increased at different days post challenge (d.p.c.) as shown in the heatmap table. Nasal swabs were assessed for the presence of MERS-CoV UpE gene by RT-qPCR for 21 d.p.c. and for 28 d.p.c. The Ct values are shown for individual camels in each group (Groups: -C (**B**), +C (**C**), -V (**D**), or +V (**E**)), the infectious camels (**F**), and as mean Ct values for each group (**G**). +: seropositive; -: seronegative (naive); C: control group; V: vaccinated group.

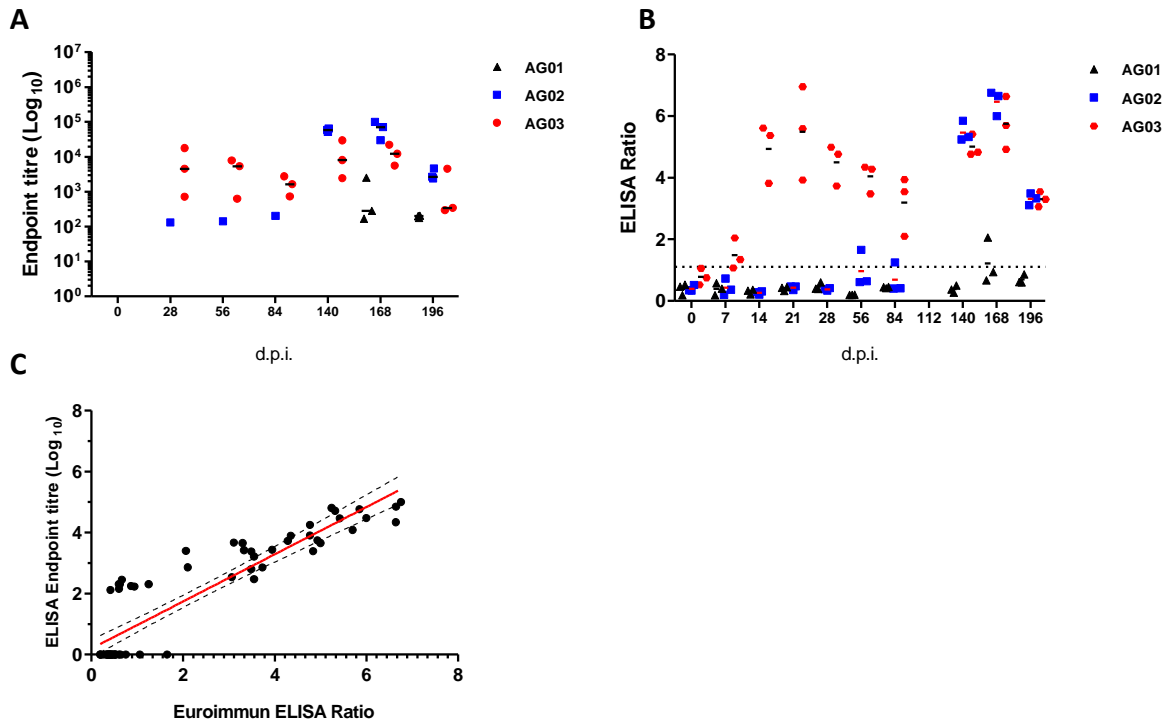

**Figure S5: Antibody immune responses in different age of dromedary calves vaccinated with ChAdOx1 MERS assessed by Euroimmun ELISA kits.**

Seronegative dromedary calves, below 1 year old, were immunised with PBS (n=2) or ChAdOx1-eGFP (n=1) in group AG01 (black triangles) or with ChAdOx1 MERS in group AG02 (n=3; blue squares). Older calves, below 2 years old, were immunised with ChAdOx1 MERS in group AG03 (n=3; red circles). Anti-spike antibody levels were assessed in endpoint titre ELISA (A) and Euroimmun ELISA kits (B). Correlation between values in both assays is presented in (C). Linear regression between the antibody titres in the Endpoint ELISA and Euroimmun ELISA ratios showed a significant relationship with  $R^2 = 0.82$  and  $p < 0.0001$ ; and a significant correlation with Pearson  $r = 0.90$  and  $p < 0.0001$ .

## II. Supplementary Photographs

Photographs taken during the course of the study (*Reference to this article must be made when citing or sharing these photos*).

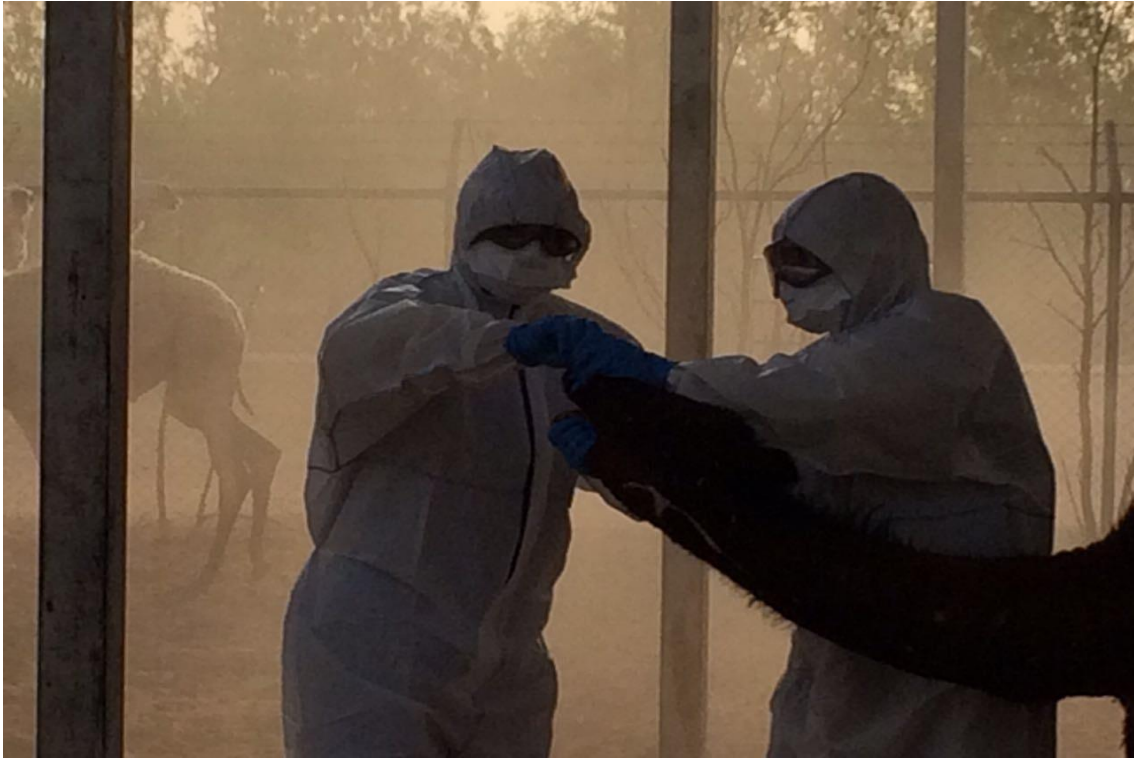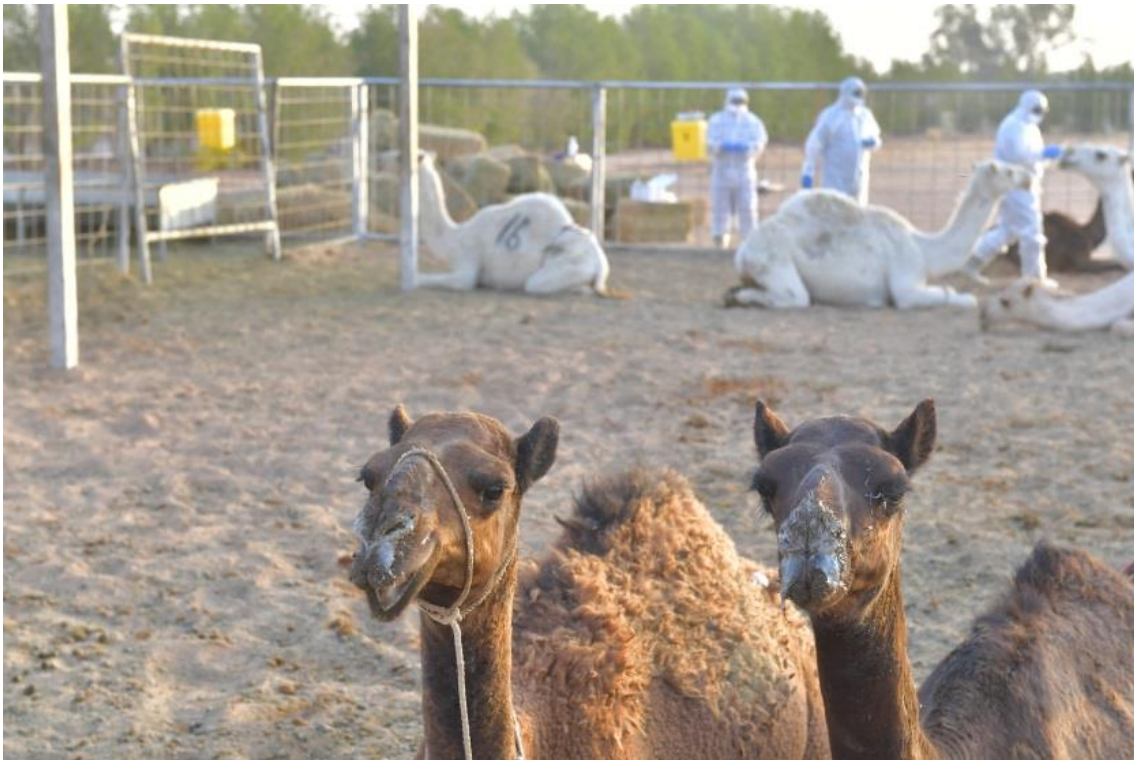

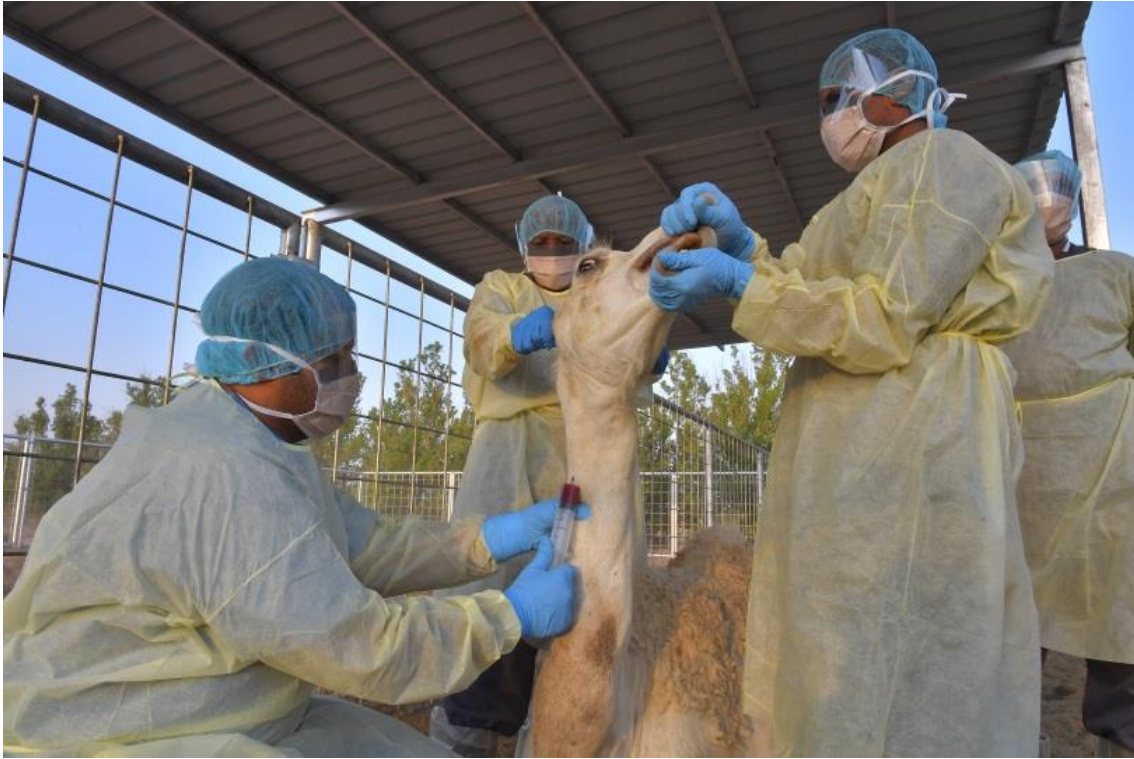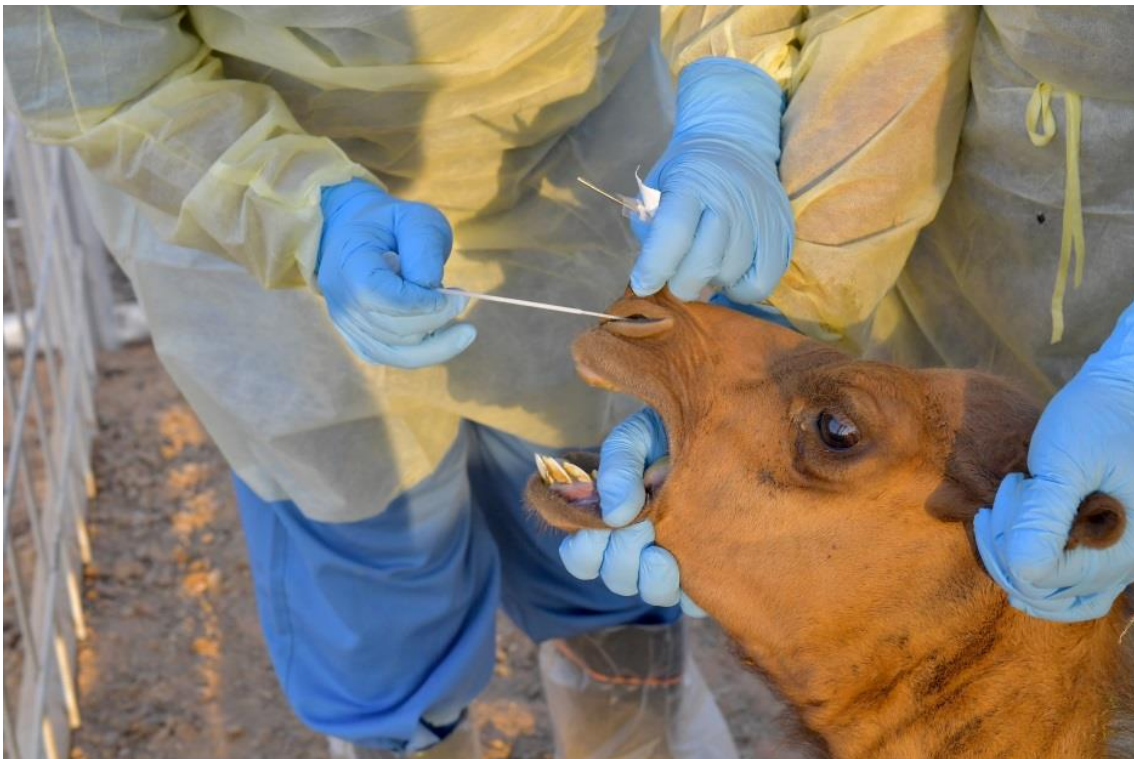



### III. Supplementary diagram on the layout of the research farm

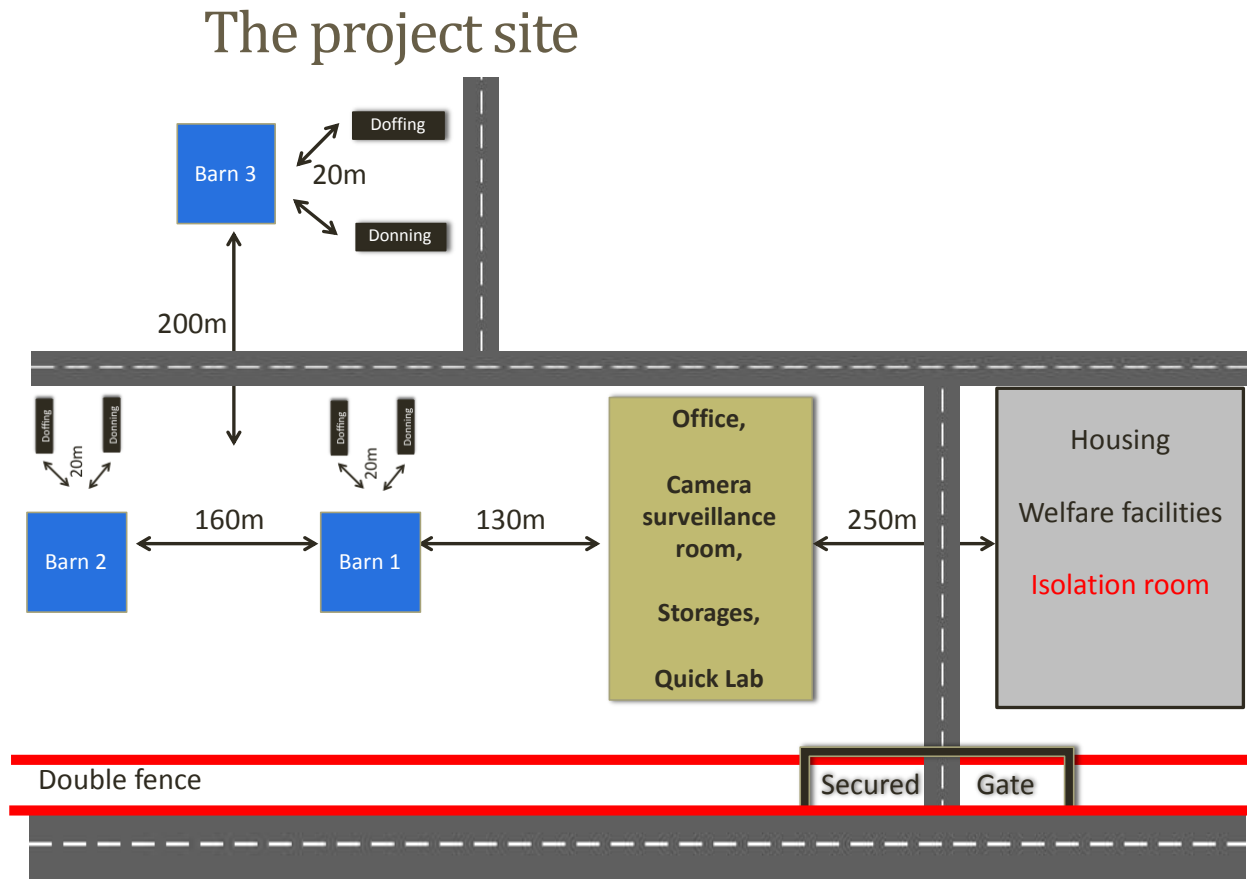

Distance is shown in metre (m). Each barn has donning and doffing dedicated areas

## VI. Supplementary details on the statistical analysis

Note: Groups: -V (also called G01-N-V); -C (also called G02-N-C); +V (also called G03-S-V); +C (also called G04-S-C) where C: control, V: vaccinated, S: seropositive, N: naïve (seronegative).

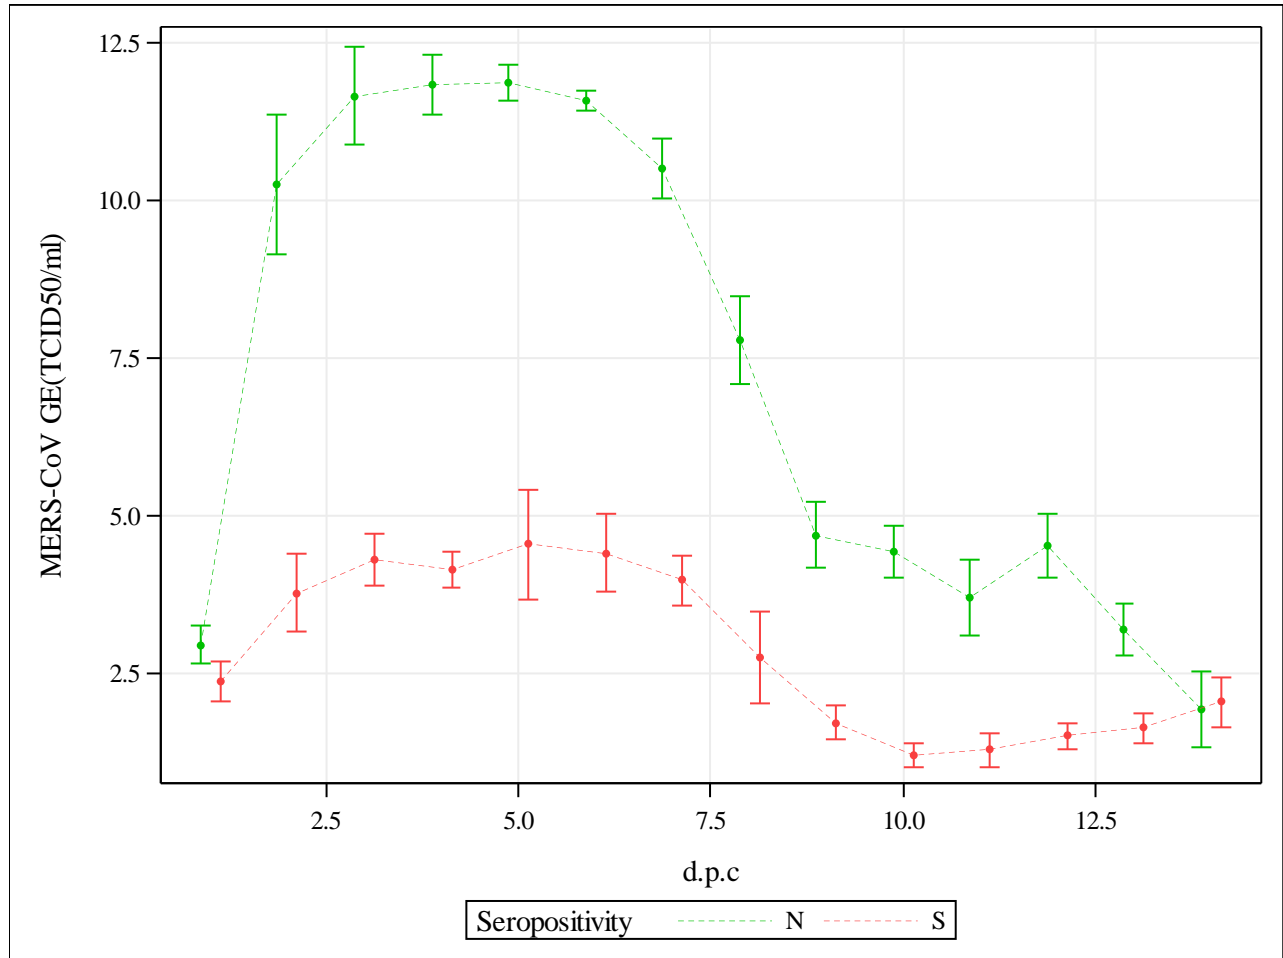

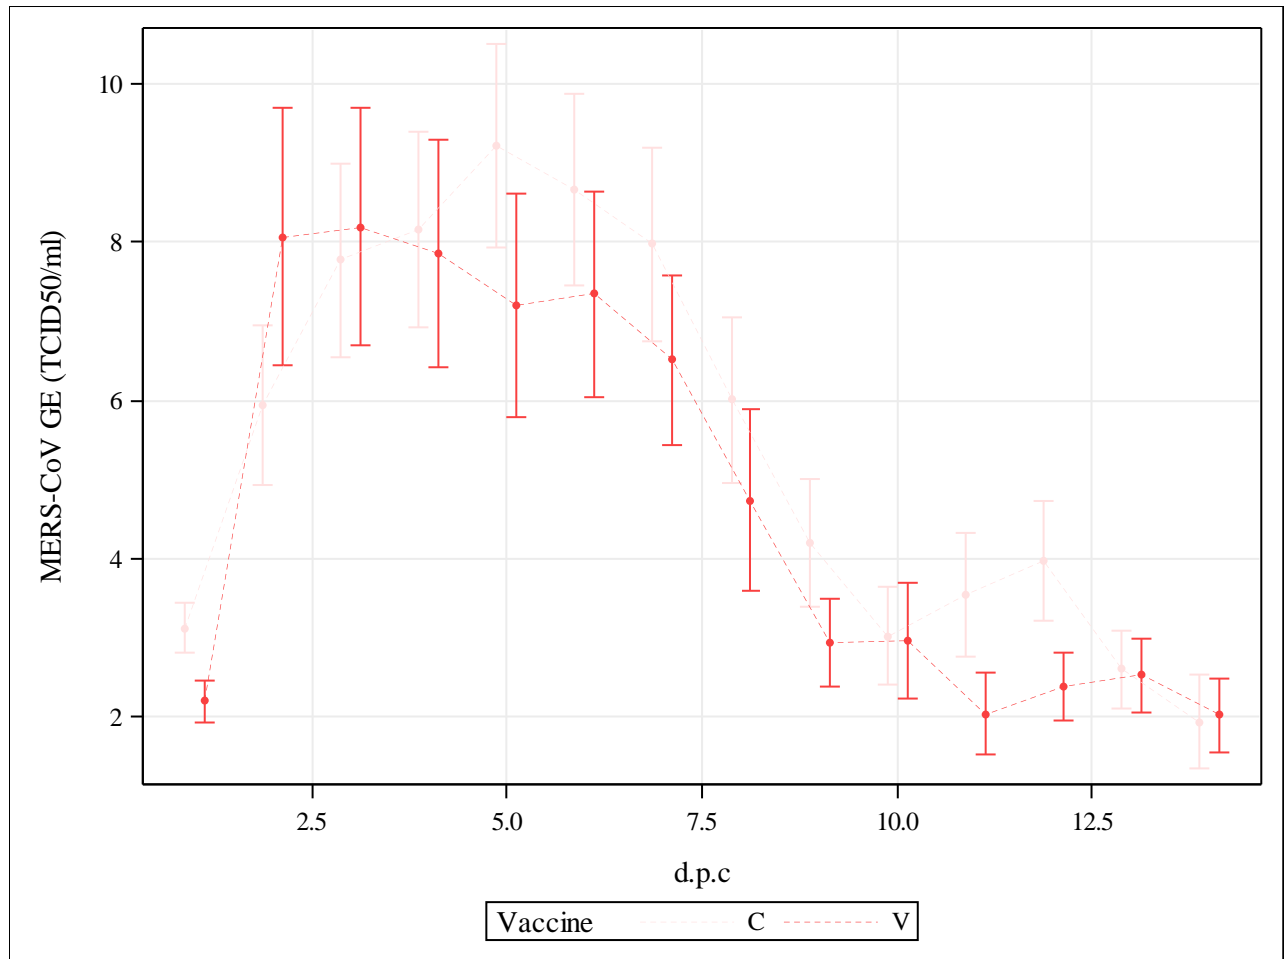

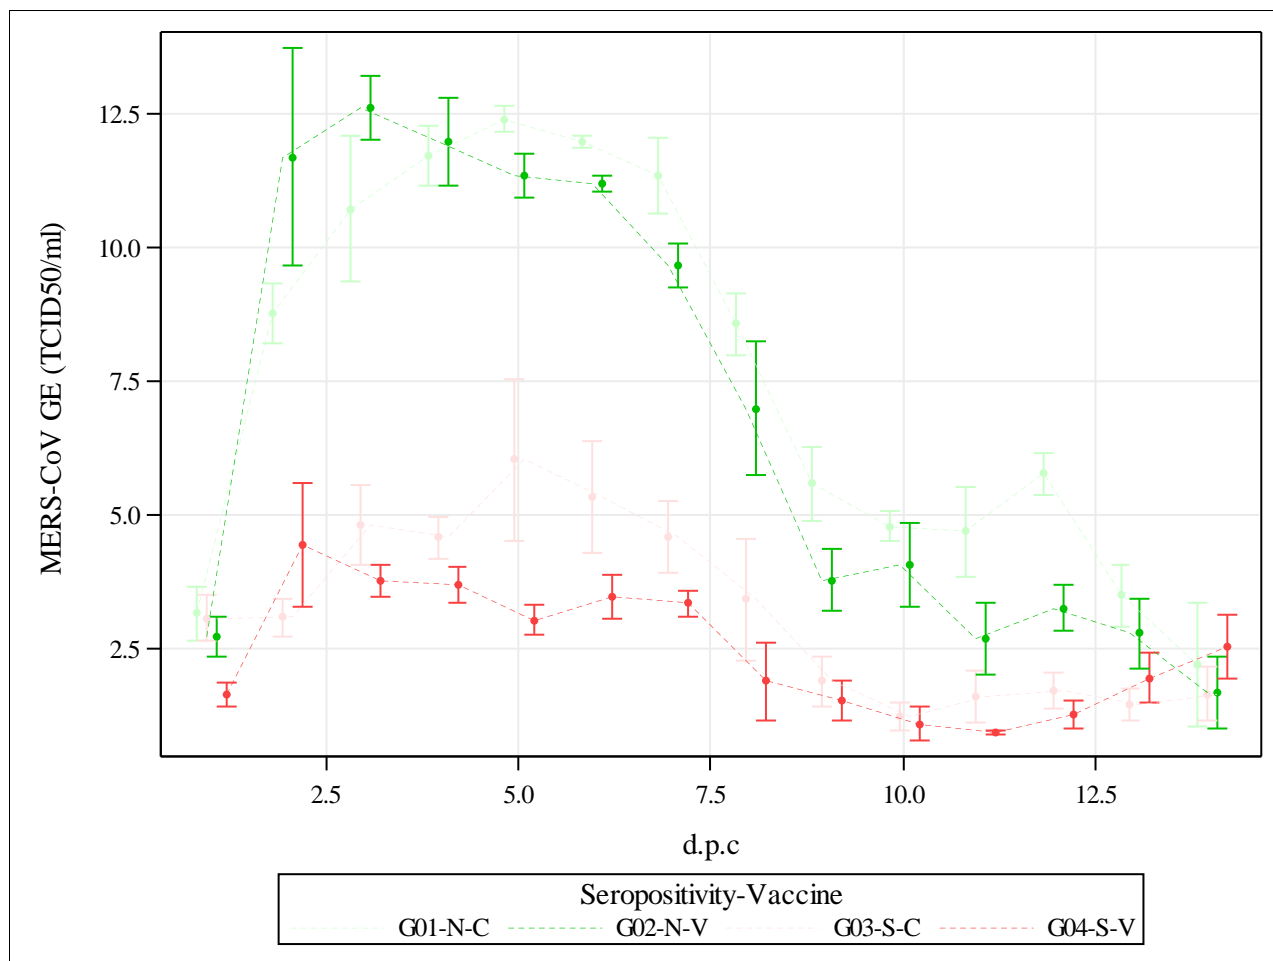

*The Mixed Procedure*

| Model Information         |                            |
|---------------------------|----------------------------|
| Data Set                  | WORK.DATA0                 |
| Dependent Variable        | Virus_titre_post_challenge |
| Covariance Structure      | Autoregressive             |
| Subject Effect            | CamelID                    |
| Estimation Method         | REML                       |
| Residual Variance Method  | Profile                    |
| Fixed Effects SE Method   | Model-Based                |
| Degrees of Freedom Method | Between-Within             |

| Class Level Information |        |                                                             |
|-------------------------|--------|-------------------------------------------------------------|
| Class                   | Levels | Values                                                      |
| d_p_c_                  | 14     | 1 2 3 4 5 6 7 8 9 10 11 12 13 14                            |
| CamelID                 | 20     | 11 12 13 14 15 21 22 23 24 25 31 32 33 34 35 41 42 43 44 45 |
| Seropositivity          | 2      | 0 1                                                         |
| Vaccine                 | 2      | 0 1                                                         |

| Dimensions            |    |
|-----------------------|----|
| Covariance Parameters | 2  |
| Columns in X          | 75 |
| Columns in Z          | 0  |
| Subjects              | 20 |
| Max Obs Per Subject   | 14 |

| Number of Observations          |     |
|---------------------------------|-----|
| Number of Observations Read     | 280 |
| Number of Observations Used     | 258 |
| Number of Observations Not Used | 22  |

| Iteration History |             |                 |            |
|-------------------|-------------|-----------------|------------|
| Iteration         | Evaluations | -2 Res Log Like | Criterion  |
| 0                 | 1           | 888.78662828    |            |
| 1                 | 2           | 865.57005966    | 0.00000020 |
| 2                 | 1           | 865.57001358    | 0.00000000 |

*The Mixed Procedure*

|                           |
|---------------------------|
| Convergence criteria met. |
|---------------------------|

**Estimated R Matrix for CamelID 11**

| Row | Col1     | Col2     | Col3     | Col4     | Col5     | Col6     | Col7     | Col8     | Col9     | Col10    | Col11    | Col12    |
|-----|----------|----------|----------|----------|----------|----------|----------|----------|----------|----------|----------|----------|
| 1   | 2.4075   | 0.7709   | 0.2468   | 0.07904  | 0.02531  | 0.008104 | 0.002595 | 0.000831 | 0.000266 | 0.000085 | 0.000027 | 8.736E-6 |
| 2   | 0.7709   | 2.4075   | 0.7709   | 0.2468   | 0.07904  | 0.02531  | 0.008104 | 0.002595 | 0.000831 | 0.000266 | 0.000085 | 0.000027 |
| 3   | 0.2468   | 0.7709   | 2.4075   | 0.7709   | 0.2468   | 0.07904  | 0.02531  | 0.008104 | 0.002595 | 0.000831 | 0.000266 | 0.000085 |
| 4   | 0.07904  | 0.2468   | 0.7709   | 2.4075   | 0.7709   | 0.2468   | 0.07904  | 0.02531  | 0.008104 | 0.002595 | 0.000831 | 0.000266 |
| 5   | 0.02531  | 0.07904  | 0.2468   | 0.7709   | 2.4075   | 0.7709   | 0.2468   | 0.07904  | 0.02531  | 0.008104 | 0.002595 | 0.000831 |
| 6   | 0.008104 | 0.02531  | 0.07904  | 0.2468   | 0.7709   | 2.4075   | 0.7709   | 0.2468   | 0.07904  | 0.02531  | 0.008104 | 0.002595 |
| 7   | 0.002595 | 0.008104 | 0.02531  | 0.07904  | 0.2468   | 0.7709   | 2.4075   | 0.7709   | 0.2468   | 0.07904  | 0.02531  | 0.008104 |
| 8   | 0.000831 | 0.002595 | 0.008104 | 0.02531  | 0.07904  | 0.2468   | 0.7709   | 2.4075   | 0.7709   | 0.2468   | 0.07904  | 0.02531  |
| 9   | 0.000266 | 0.000831 | 0.002595 | 0.008104 | 0.02531  | 0.07904  | 0.2468   | 0.7709   | 2.4075   | 0.7709   | 0.2468   | 0.07904  |
| 10  | 0.000085 | 0.000266 | 0.000831 | 0.002595 | 0.008104 | 0.02531  | 0.07904  | 0.2468   | 0.7709   | 2.4075   | 0.7709   | 0.2468   |
| 11  | 0.000027 | 0.000085 | 0.000266 | 0.000831 | 0.002595 | 0.008104 | 0.02531  | 0.07904  | 0.2468   | 0.7709   | 2.4075   | 0.7709   |
| 12  | 8.736E-6 | 0.000027 | 0.000085 | 0.000266 | 0.000831 | 0.002595 | 0.008104 | 0.02531  | 0.07904  | 0.2468   | 0.7709   | 2.4075   |
| 13  | 2.797E-6 | 8.736E-6 | 0.000027 | 0.000085 | 0.000266 | 0.000831 | 0.002595 | 0.008104 | 0.02531  | 0.07904  | 0.2468   | 0.7709   |
| 14  | 8.957E-7 | 2.797E-6 | 8.736E-6 | 0.000027 | 0.000085 | 0.000266 | 0.000831 | 0.002595 | 0.008104 | 0.02531  | 0.07904  | 0.2468   |

**Estimated R Matrix for CamelID 11**

| Row | Col13    | Col14    |
|-----|----------|----------|
| 1   | 2.797E-6 | 8.957E-7 |
| 2   | 8.736E-6 | 2.797E-6 |
| 3   | 0.000027 | 8.736E-6 |
| 4   | 0.000085 | 0.000027 |
| 5   | 0.000266 | 0.000085 |
| 6   | 0.000831 | 0.000266 |
| 7   | 0.002595 | 0.000831 |
| 8   | 0.008104 | 0.002595 |
| 9   | 0.02531  | 0.008104 |
| 10  | 0.07904  | 0.02531  |
| 11  | 0.2468   | 0.07904  |
| 12  | 0.7709   | 0.2468   |
| 13  | 2.4075   | 0.7709   |
| 14  | 0.7709   | 2.4075   |

*The Mixed Procedure***Estimated R Correlation Matrix for CamelID 11**

| Row | Col1     | Col2     | Col3     | Col4     | Col5     | Col6     | Col7     | Col8     | Col9     | Col10    | Col11    | Col12    |
|-----|----------|----------|----------|----------|----------|----------|----------|----------|----------|----------|----------|----------|
| 1   | 1.0000   | 0.3202   | 0.1025   | 0.03283  | 0.01051  | 0.003366 | 0.001078 | 0.000345 | 0.000111 | 0.000035 | 0.000011 | 3.629E-6 |
| 2   | 0.3202   | 1.0000   | 0.3202   | 0.1025   | 0.03283  | 0.01051  | 0.003366 | 0.001078 | 0.000345 | 0.000111 | 0.000035 | 0.000011 |
| 3   | 0.1025   | 0.3202   | 1.0000   | 0.3202   | 0.1025   | 0.03283  | 0.01051  | 0.003366 | 0.001078 | 0.000345 | 0.000111 | 0.000035 |
| 4   | 0.03283  | 0.1025   | 0.3202   | 1.0000   | 0.3202   | 0.1025   | 0.03283  | 0.01051  | 0.003366 | 0.001078 | 0.000345 | 0.000111 |
| 5   | 0.01051  | 0.03283  | 0.1025   | 0.3202   | 1.0000   | 0.3202   | 0.1025   | 0.03283  | 0.01051  | 0.003366 | 0.001078 | 0.000345 |
| 6   | 0.003366 | 0.01051  | 0.03283  | 0.1025   | 0.3202   | 1.0000   | 0.3202   | 0.1025   | 0.03283  | 0.01051  | 0.003366 | 0.001078 |
| 7   | 0.001078 | 0.003366 | 0.01051  | 0.03283  | 0.1025   | 0.3202   | 1.0000   | 0.3202   | 0.1025   | 0.03283  | 0.01051  | 0.003366 |
| 8   | 0.000345 | 0.001078 | 0.003366 | 0.01051  | 0.03283  | 0.1025   | 0.3202   | 1.0000   | 0.3202   | 0.1025   | 0.03283  | 0.01051  |
| 9   | 0.000111 | 0.000345 | 0.001078 | 0.003366 | 0.01051  | 0.03283  | 0.1025   | 0.3202   | 1.0000   | 0.3202   | 0.1025   | 0.03283  |
| 10  | 0.000035 | 0.000111 | 0.000345 | 0.001078 | 0.003366 | 0.01051  | 0.03283  | 0.1025   | 0.3202   | 1.0000   | 0.3202   | 0.1025   |
| 11  | 0.000011 | 0.000035 | 0.000111 | 0.000345 | 0.001078 | 0.003366 | 0.01051  | 0.03283  | 0.1025   | 0.3202   | 1.0000   | 0.3202   |
| 12  | 3.629E-6 | 0.000011 | 0.000035 | 0.000111 | 0.000345 | 0.001078 | 0.003366 | 0.01051  | 0.03283  | 0.1025   | 0.3202   | 1.0000   |
| 13  | 1.162E-6 | 3.629E-6 | 0.000011 | 0.000035 | 0.000111 | 0.000345 | 0.001078 | 0.003366 | 0.01051  | 0.03283  | 0.1025   | 0.3202   |
| 14  | 3.721E-7 | 1.162E-6 | 3.629E-6 | 0.000011 | 0.000035 | 0.000111 | 0.000345 | 0.001078 | 0.003366 | 0.01051  | 0.03283  | 0.1025   |

| <b>Estimated R<br/>Correlation Matrix for<br/>CamelID 11</b> |          |          |
|--------------------------------------------------------------|----------|----------|
| Row                                                          | Col13    | Col14    |
| 1                                                            | 1.162E-6 | 3.721E-7 |
| 2                                                            | 3.629E-6 | 1.162E-6 |
| 3                                                            | 0.000011 | 3.629E-6 |
| 4                                                            | 0.000035 | 0.000011 |
| 5                                                            | 0.000111 | 0.000035 |
| 6                                                            | 0.000345 | 0.000111 |
| 7                                                            | 0.001078 | 0.000345 |
| 8                                                            | 0.003366 | 0.001078 |
| 9                                                            | 0.01051  | 0.003366 |
| 10                                                           | 0.03283  | 0.01051  |
| 11                                                           | 0.1025   | 0.03283  |
| 12                                                           | 0.3202   | 0.1025   |
| 13                                                           | 1.0000   | 0.3202   |
| 14                                                           | 0.3202   | 1.0000   |

*The Mixed Procedure*

| Covariance Parameter Estimates |         |          |
|--------------------------------|---------|----------|
| Cov Parm                       | Subject | Estimate |
| AR(1)                          | CamelID | 0.3202   |
| Residual                       |         | 2.4075   |

| Fit Statistics           |       |
|--------------------------|-------|
| -2 Res Log Likelihood    | 865.6 |
| AIC (smaller is better)  | 869.6 |
| AICC (smaller is better) | 869.6 |
| BIC (smaller is better)  | 871.6 |

| Null Model Likelihood Ratio Test |            |            |
|----------------------------------|------------|------------|
| DF                               | Chi-Square | Pr > ChiSq |
| 1                                | 23.22      | <.0001     |

| Solution for Fixed Effects |        |                |         |          |                |     |         |         |
|----------------------------|--------|----------------|---------|----------|----------------|-----|---------|---------|
| Effect                     | d_p_c_ | Seropositivity | Vaccine | Estimate | Standard Error | DF  | t Value | Pr >  t |
| Intercept                  |        |                |         | 2.1258   | 0.7302         | 17  | 2.91    | 0.0097  |
| d_p_c_                     | 1      |                |         | -0.2160  | 0.9457         | 199 | -0.23   | 0.8195  |
| d_p_c_                     | 2      |                |         | 2.7107   | 0.9457         | 199 | 2.87    | 0.0046  |
| d_p_c_                     | 3      |                |         | 2.3857   | 0.9457         | 199 | 2.52    | 0.0124  |
| d_p_c_                     | 4      |                |         | 1.8748   | 0.9457         | 199 | 1.98    | 0.0488  |
| d_p_c_                     | 5      |                |         | 1.4098   | 0.9457         | 199 | 1.49    | 0.1376  |
| d_p_c_                     | 6      |                |         | 1.6282   | 0.9456         | 199 | 1.72    | 0.0867  |
| d_p_c_                     | 7      |                |         | 1.1233   | 0.9455         | 199 | 1.19    | 0.2363  |
| d_p_c_                     | 8      |                |         | -0.1722  | 0.9725         | 199 | -0.18   | 0.8597  |
| d_p_c_                     | 9      |                |         | -0.9122  | 1.0268         | 199 | -0.89   | 0.3754  |
| d_p_c_                     | 10     |                |         | -1.1342  | 1.0120         | 199 | -1.12   | 0.2638  |
| d_p_c_                     | 11     |                |         | -1.5910  | 1.0177         | 199 | -1.56   | 0.1196  |
| d_p_c_                     | 12     |                |         | -1.4066  | 0.9349         | 199 | -1.50   | 0.1340  |
| d_p_c_                     | 13     |                |         | -0.4489  | 0.9779         | 199 | -0.46   | 0.6467  |
| d_p_c_                     | 14     |                |         | 0        | .              | .   | .       | .       |
| Seropositivity             |        | 0              |         | -0.1757  | 0.7818         | 17  | -0.22   | 0.8248  |



*The Mixed Procedure*

| Solution for Fixed Effects |        |                |         |          |                |     |         |         |
|----------------------------|--------|----------------|---------|----------|----------------|-----|---------|---------|
| Effect                     | d_p_c_ | Seropositivity | Vaccine | Estimate | Standard Error | DF  | t Value | Pr >  t |
| Seropositivity             |        | 1              |         | 0        | .              | .   | .       | .       |
| Vaccine                    |        |                | 0       | -0.1233  | 0.7757         | 17  | -0.16   | 0.8755  |
| Vaccine                    |        |                | 1       | 0        | .              | .   | .       | .       |
| d_p_c_*Seropositivit       | 1      | 0              |         | 0.7593   | 1.0454         | 199 | 0.73    | 0.4685  |
| d_p_c_*Seropositivit       | 1      | 1              |         | 0        | .              | .   | .       | .       |
| d_p_c_*Seropositivit       | 2      | 0              |         | 6.6415   | 1.0454         | 199 | 6.35    | <.0001  |
| d_p_c_*Seropositivit       | 2      | 1              |         | 0        | .              | .   | .       | .       |
| d_p_c_*Seropositivit       | 3      | 0              |         | 7.5349   | 1.0453         | 199 | 7.21    | <.0001  |
| d_p_c_*Seropositivit       | 3      | 1              |         | 0        | .              | .   | .       | .       |
| d_p_c_*Seropositivit       | 4      | 0              |         | 7.8667   | 1.0453         | 199 | 7.53    | <.0001  |
| d_p_c_*Seropositivit       | 4      | 1              |         | 0        | .              | .   | .       | .       |
| d_p_c_*Seropositivit       | 5      | 0              |         | 7.5032   | 1.0453         | 199 | 7.18    | <.0001  |
| d_p_c_*Seropositivit       | 5      | 1              |         | 0        | .              | .   | .       | .       |
| d_p_c_*Seropositivit       | 6      | 0              |         | 7.3501   | 1.0453         | 199 | 7.03    | <.0001  |
| d_p_c_*Seropositivit       | 6      | 1              |         | 0        | .              | .   | .       | .       |
| d_p_c_*Seropositivit       | 7      | 0              |         | 6.7013   | 1.0452         | 199 | 6.41    | <.0001  |
| d_p_c_*Seropositivit       | 7      | 1              |         | 0        | .              | .   | .       | .       |
| d_p_c_*Seropositivit       | 8      | 0              |         | 5.2587   | 1.0559         | 199 | 4.98    | <.0001  |
| d_p_c_*Seropositivit       | 8      | 1              |         | 0        | .              | .   | .       | .       |
| d_p_c_*Seropositivit       | 9      | 0              |         | 3.0555   | 1.1063         | 199 | 2.76    | 0.0063  |
| d_p_c_*Seropositivit       | 9      | 1              |         | 0        | .              | .   | .       | .       |
| d_p_c_*Seropositivit       | 10     | 0              |         | 3.4176   | 1.0695         | 199 | 3.20    | 0.0016  |
| d_p_c_*Seropositivit       | 10     | 1              |         | 0        | .              | .   | .       | .       |
| d_p_c_*Seropositivit       | 11     | 0              |         | 2.6550   | 1.0945         | 199 | 2.43    | 0.0162  |
| d_p_c_*Seropositivit       | 11     | 1              |         | 0        | .              | .   | .       | .       |
| d_p_c_*Seropositivit       | 12     | 0              |         | 3.2084   | 1.0200         | 199 | 3.15    | 0.0019  |
| d_p_c_*Seropositivit       | 12     | 1              |         | 0        | .              | .   | .       | .       |
| d_p_c_*Seropositivit       | 13     | 0              |         | 1.5815   | 0.9793         | 199 | 1.61    | 0.1079  |
| d_p_c_*Seropositivit       | 13     | 1              |         | 0        | .              | .   | .       | .       |
| d_p_c_*Seropositivit       | 14     | 0              |         | 0        | .              | .   | .       | .       |
| d_p_c_*Seropositivit       | 14     | 1              |         | 0        | .              | .   | .       | .       |
| d_p_c_*Vaccine             | 1      |                | 0       | 1.0482   | 1.0407         | 199 | 1.01    | 0.3151  |
| d_p_c_*Vaccine             | 1      |                | 1       | 0        | .              | .   | .       | .       |
| d_p_c_*Vaccine             | 2      |                | 0       | -2.0051  | 1.0407         | 199 | -1.93   | 0.0554  |

*The Mixed Procedure*

| Solution for Fixed Effects |        |                |         |          |                |     |         |         |
|----------------------------|--------|----------------|---------|----------|----------------|-----|---------|---------|
| Effect                     | d_p_c_ | Seropositivity | Vaccine | Estimate | Standard Error | DF  | t Value | Pr >  t |
| d_p_c_*Vaccine             | 2      |                | 1       | 0        | .              | .   | .       | .       |
| d_p_c_*Vaccine             | 3      |                | 0       | -0.3004  | 1.0407         | 199 | -0.29   | 0.7732  |
| d_p_c_*Vaccine             | 3      |                | 1       | 0        | .              | .   | .       | .       |
| d_p_c_*Vaccine             | 4      |                | 0       | 0.4296   | 1.0407         | 199 | 0.41    | 0.6802  |
| d_p_c_*Vaccine             | 4      |                | 1       | 0        | .              | .   | .       | .       |
| d_p_c_*Vaccine             | 5      |                | 0       | 2.1447   | 1.0407         | 199 | 2.06    | 0.0406  |
| d_p_c_*Vaccine             | 5      |                | 1       | 0        | .              | .   | .       | .       |
| d_p_c_*Vaccine             | 6      |                | 0       | 1.4380   | 1.0407         | 199 | 1.38    | 0.1686  |
| d_p_c_*Vaccine             | 6      |                | 1       | 0        | .              | .   | .       | .       |
| d_p_c_*Vaccine             | 7      |                | 0       | 1.5824   | 1.0406         | 199 | 1.52    | 0.1299  |
| d_p_c_*Vaccine             | 7      |                | 1       | 0        | .              | .   | .       | .       |
| d_p_c_*Vaccine             | 8      |                | 0       | 1.6318   | 1.0514         | 199 | 1.55    | 0.1222  |
| d_p_c_*Vaccine             | 8      |                | 1       | 0        | .              | .   | .       | .       |
| d_p_c_*Vaccine             | 9      |                | 0       | 1.3215   | 1.0865         | 199 | 1.22    | 0.2253  |
| d_p_c_*Vaccine             | 9      |                | 1       | 0        | .              | .   | .       | .       |
| d_p_c_*Vaccine             | 10     |                | 0       | 0.5375   | 1.0649         | 199 | 0.50    | 0.6143  |
| d_p_c_*Vaccine             | 10     |                | 1       | 0        | .              | .   | .       | .       |
| d_p_c_*Vaccine             | 11     |                | 0       | 1.5011   | 1.0736         | 199 | 1.40    | 0.1636  |
| d_p_c_*Vaccine             | 11     |                | 1       | 0        | .              | .   | .       | .       |
| d_p_c_*Vaccine             | 12     |                | 0       | 1.6740   | 1.0126         | 199 | 1.65    | 0.0999  |
| d_p_c_*Vaccine             | 12     |                | 1       | 0        | .              | .   | .       | .       |
| d_p_c_*Vaccine             | 13     |                | 0       | 0.2197   | 0.9688         | 199 | 0.23    | 0.8208  |
| d_p_c_*Vaccine             | 13     |                | 1       | 0        | .              | .   | .       | .       |
| d_p_c_*Vaccine             | 14     |                | 0       | 0        | .              | .   | .       | .       |
| d_p_c_*Vaccine             | 14     |                | 1       | 0        | .              | .   | .       | .       |

| Type 3 Tests of Fixed Effects |        |        |         |        |
|-------------------------------|--------|--------|---------|--------|
| Effect                        | Num DF | Den DF | F Value | Pr > F |
| d_p_c_                        | 13     | 199    | 35.21   | <.0001 |
| Seropositivity                | 1      | 17     | 284.28  | <.0001 |
| Vaccine                       | 1      | 17     | 6.89    | 0.0177 |
| d_p_c_*Seropositivit          | 13     | 199    | 11.44   | <.0001 |
| d_p_c_*Vaccine                | 13     | 199    | 2.36    | 0.0059 |

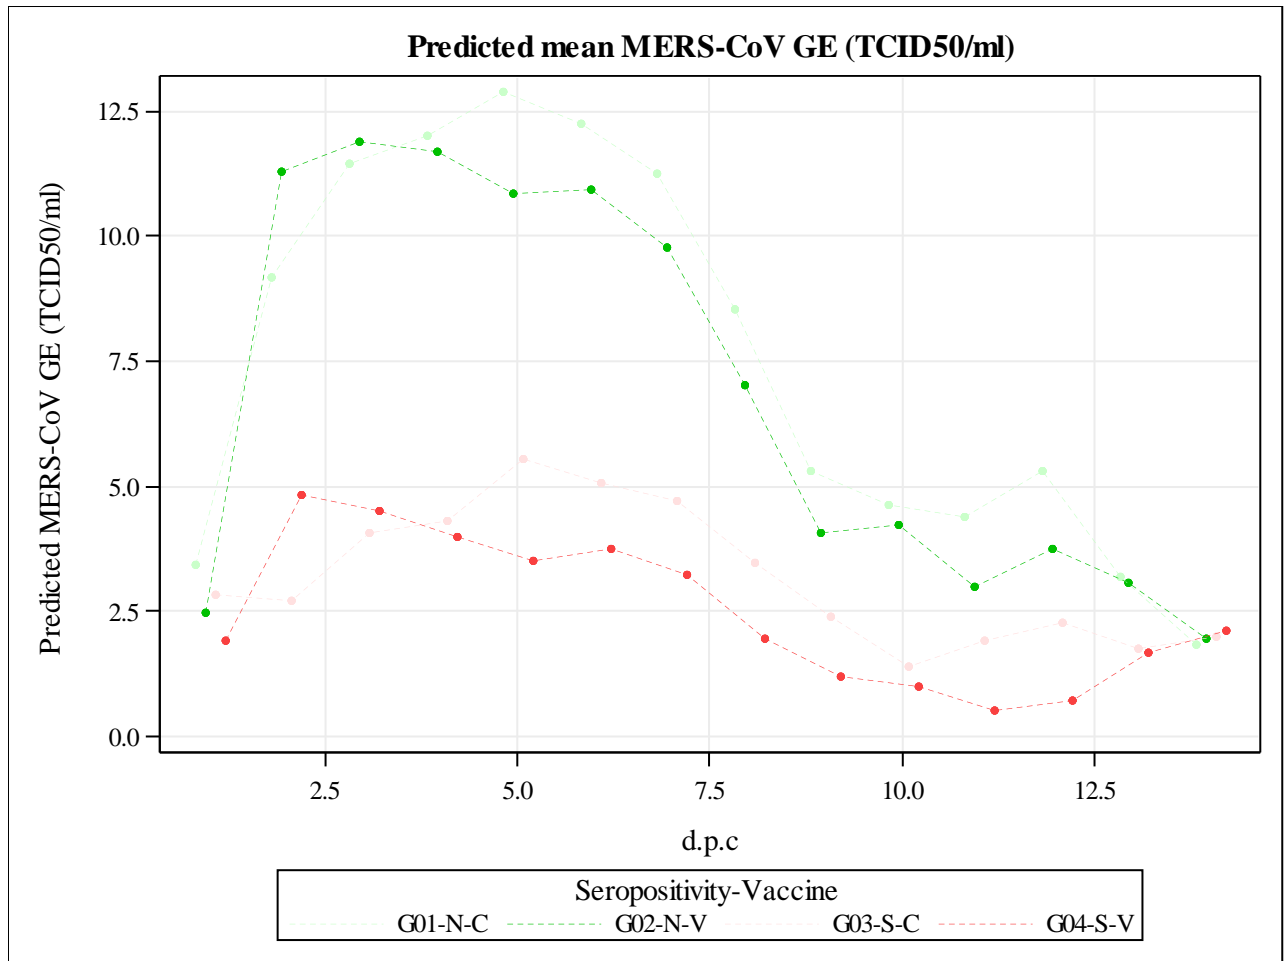

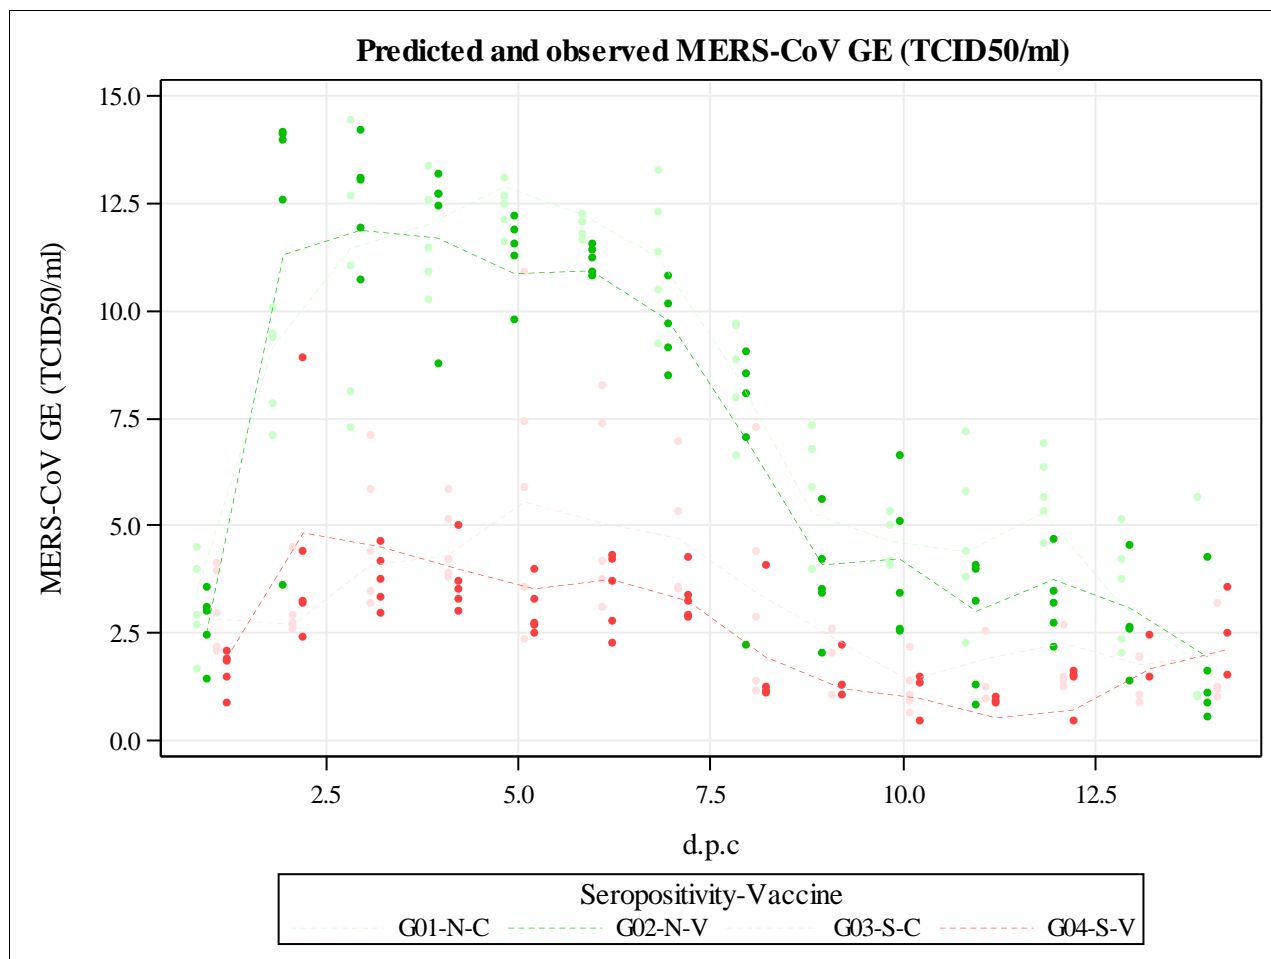

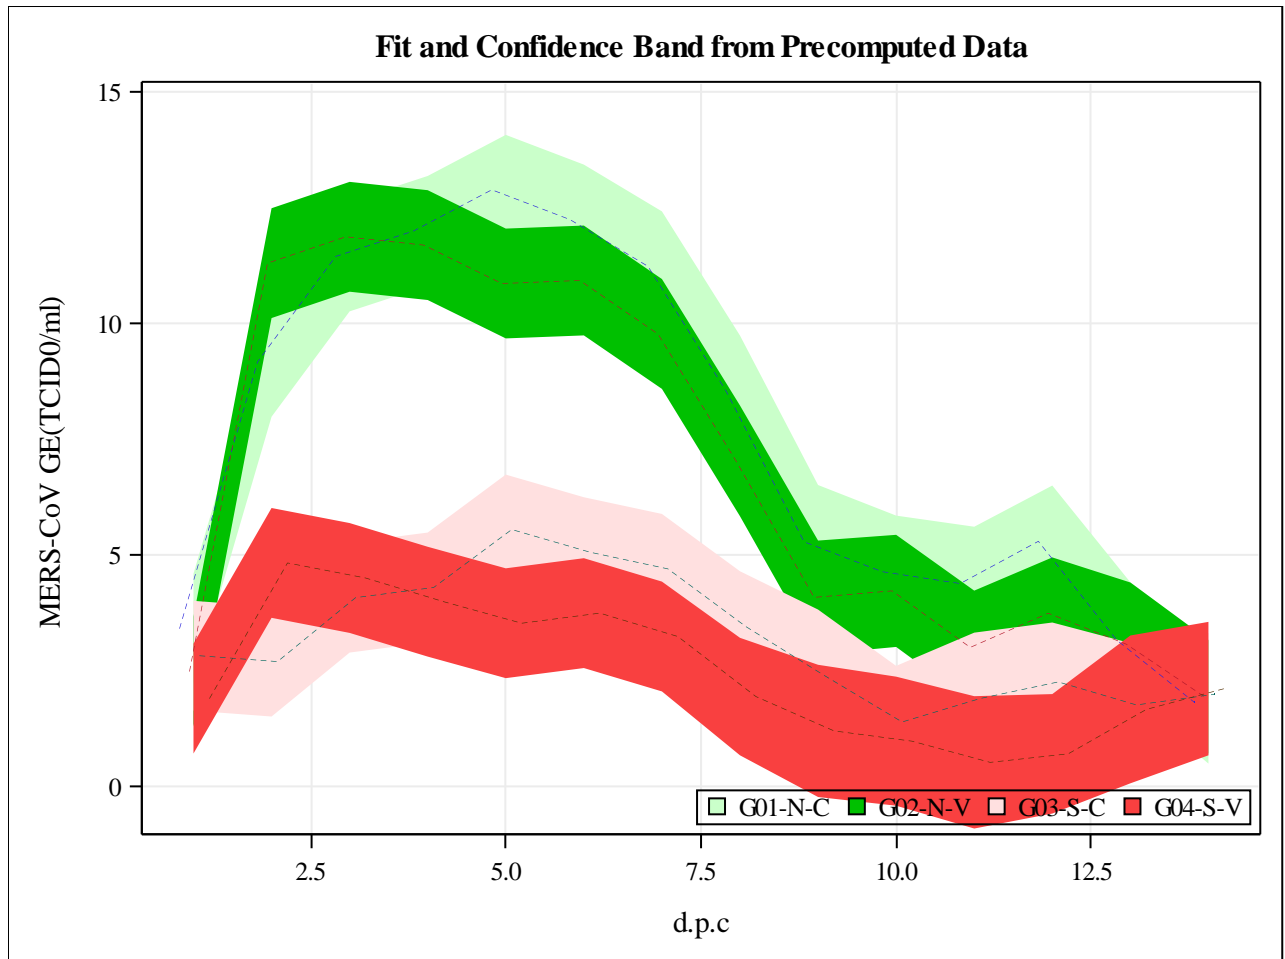

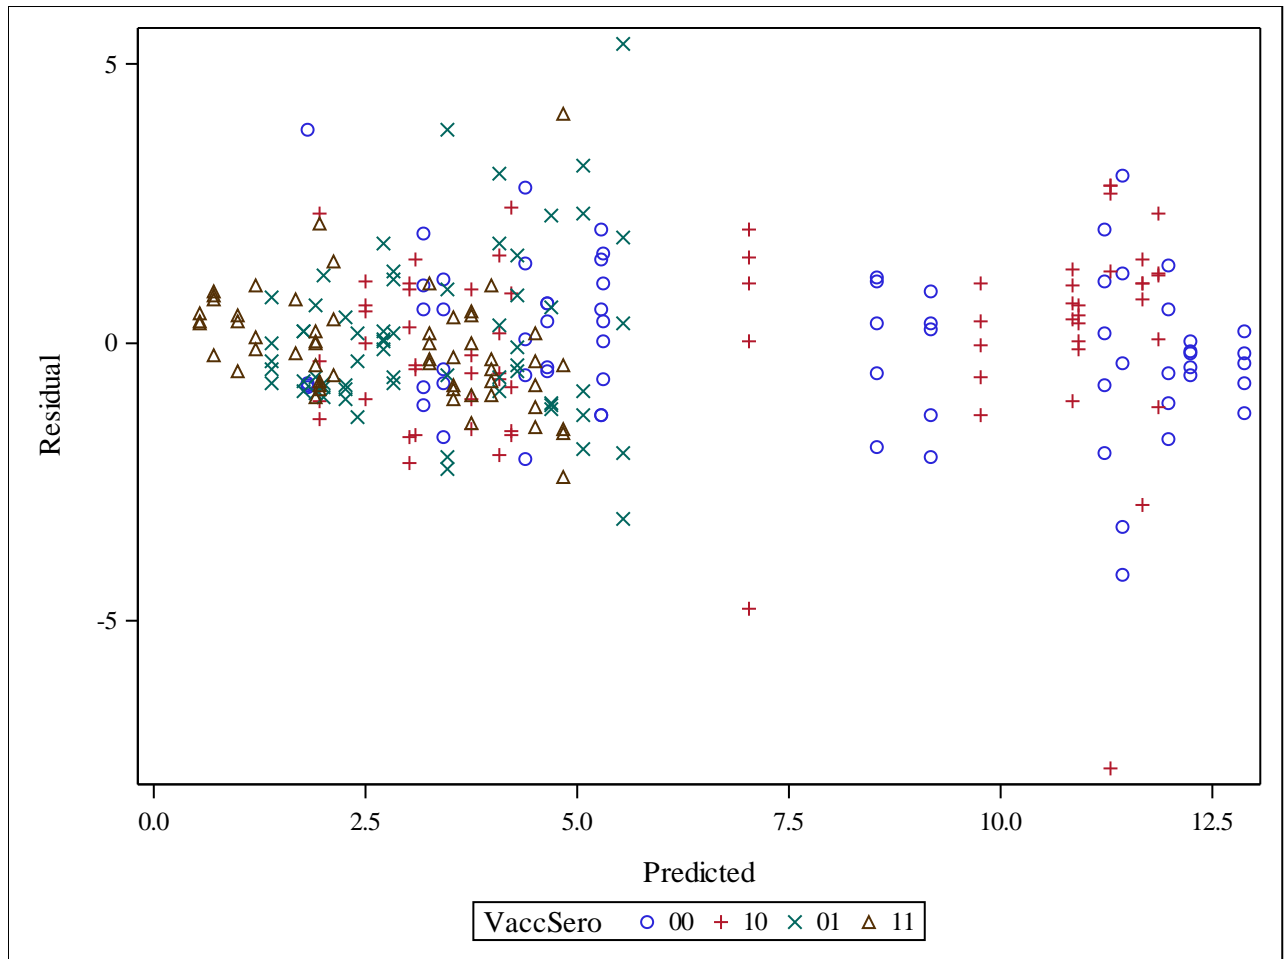

*The MEANS Procedure*

| <b>Analysis Variable : areaRect</b> |              |             |
|-------------------------------------|--------------|-------------|
| <b>CamelID</b>                      | <b>N Obs</b> | <b>Sum</b>  |
| 11                                  | 14           | 96.7460828  |
| 12                                  | 14           | 107.8487485 |
| 13                                  | 14           | 96.1011404  |
| 14                                  | 14           | 110.5697307 |
| 15                                  | 14           | 99.4420902  |
| 21                                  | 14           | 99.9070033  |
| 22                                  | 14           | 89.6964427  |
| 23                                  | 14           | 95.9023348  |
| 24                                  | 14           | 99.2099861  |
| 25                                  | 14           | 82.3156968  |
| 31                                  | 14           | 59.5459676  |
| 32                                  | 14           | 24.9573527  |
| 33                                  | 14           | 32.5058721  |
| 34                                  | 14           | 25.1188792  |
| 35                                  | 14           | 46.9222652  |
| 41                                  | 14           | 27.4368385  |
| 42                                  | 14           | 23.0595128  |
| 43                                  | 14           | 27.6492982  |
| 44                                  | 14           | 21.6483356  |
| 45                                  | 14           | 29.6137791  |

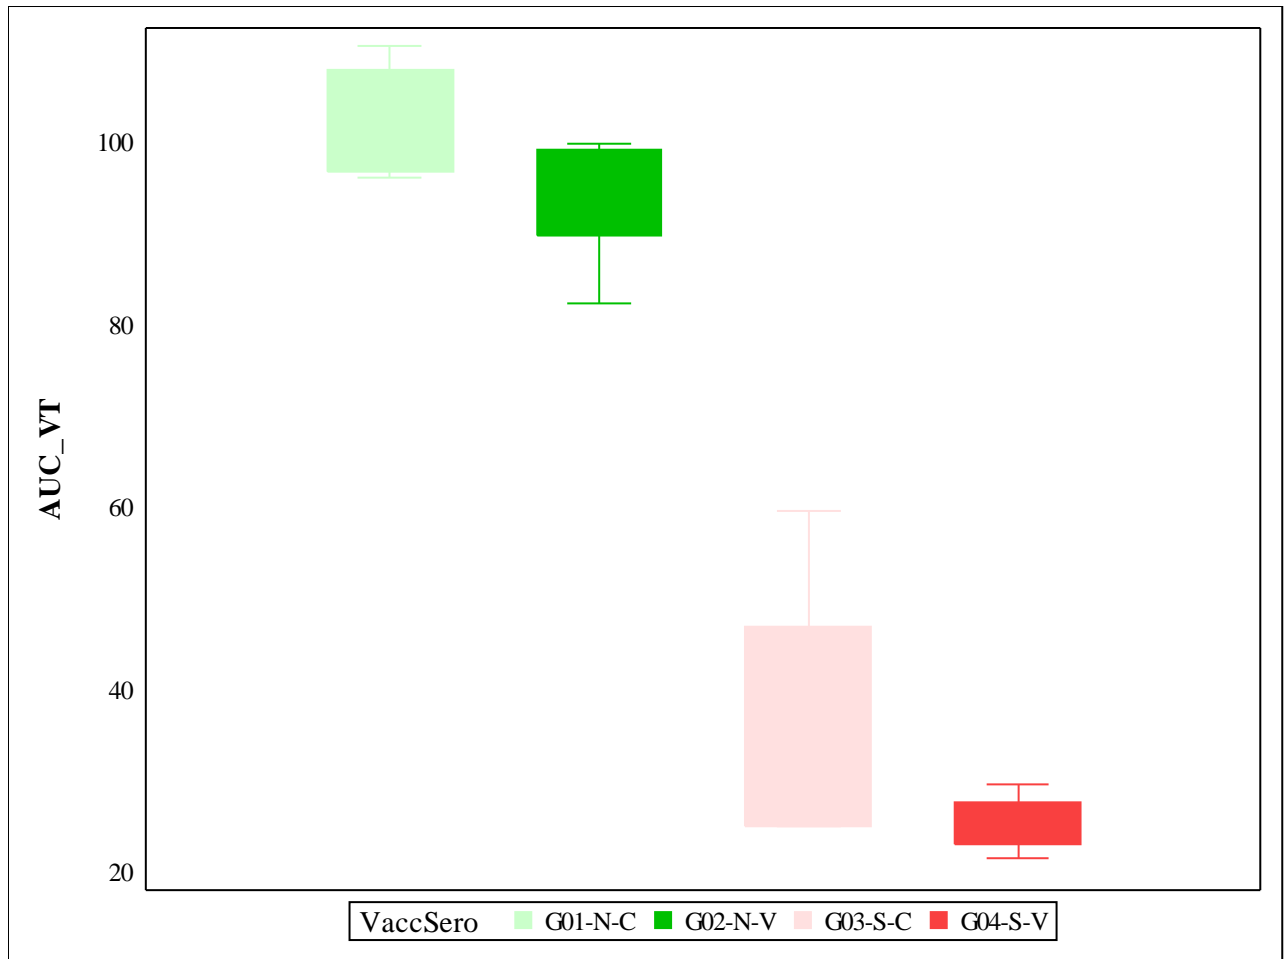



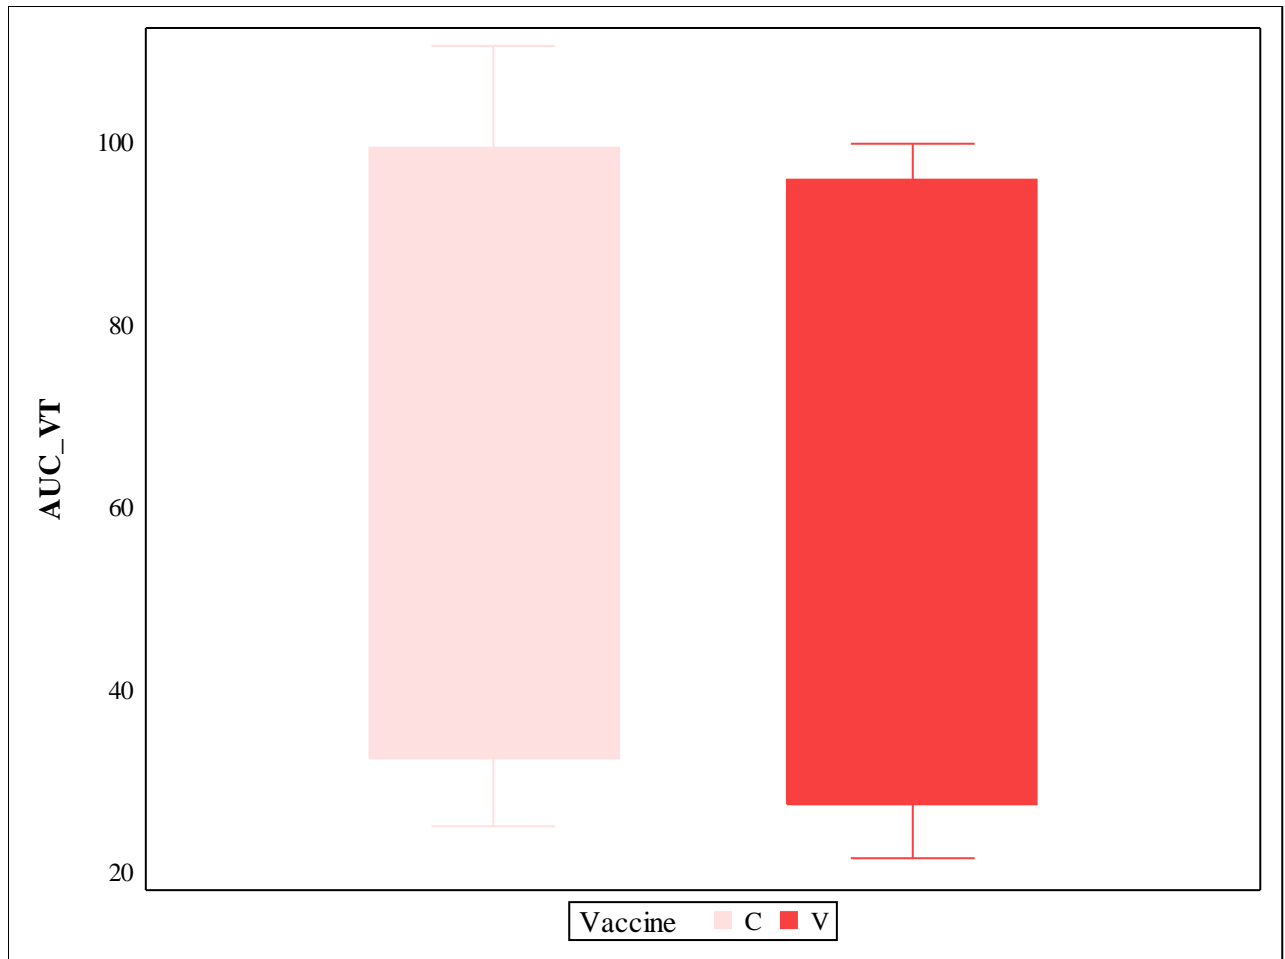

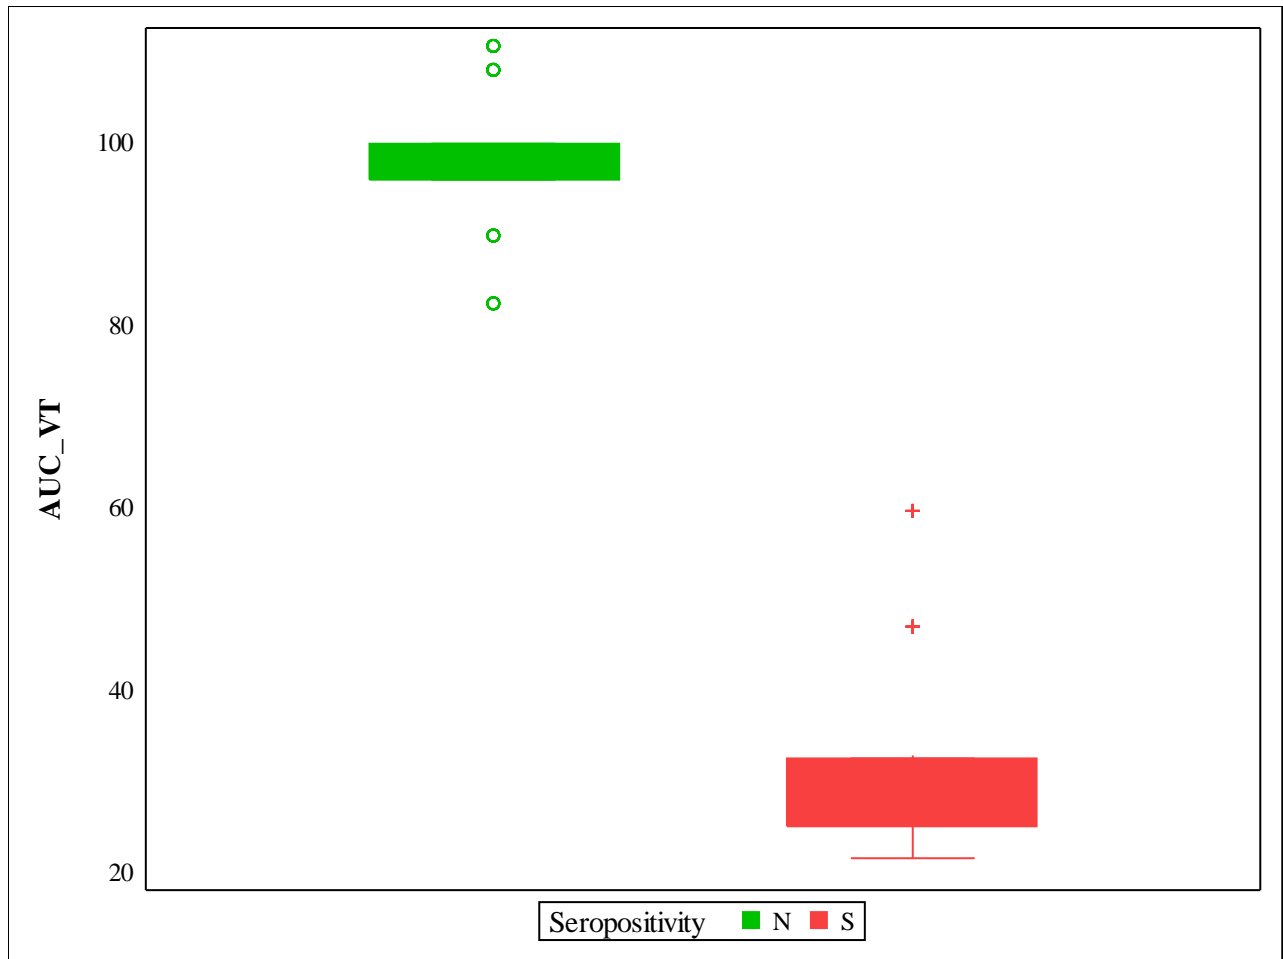

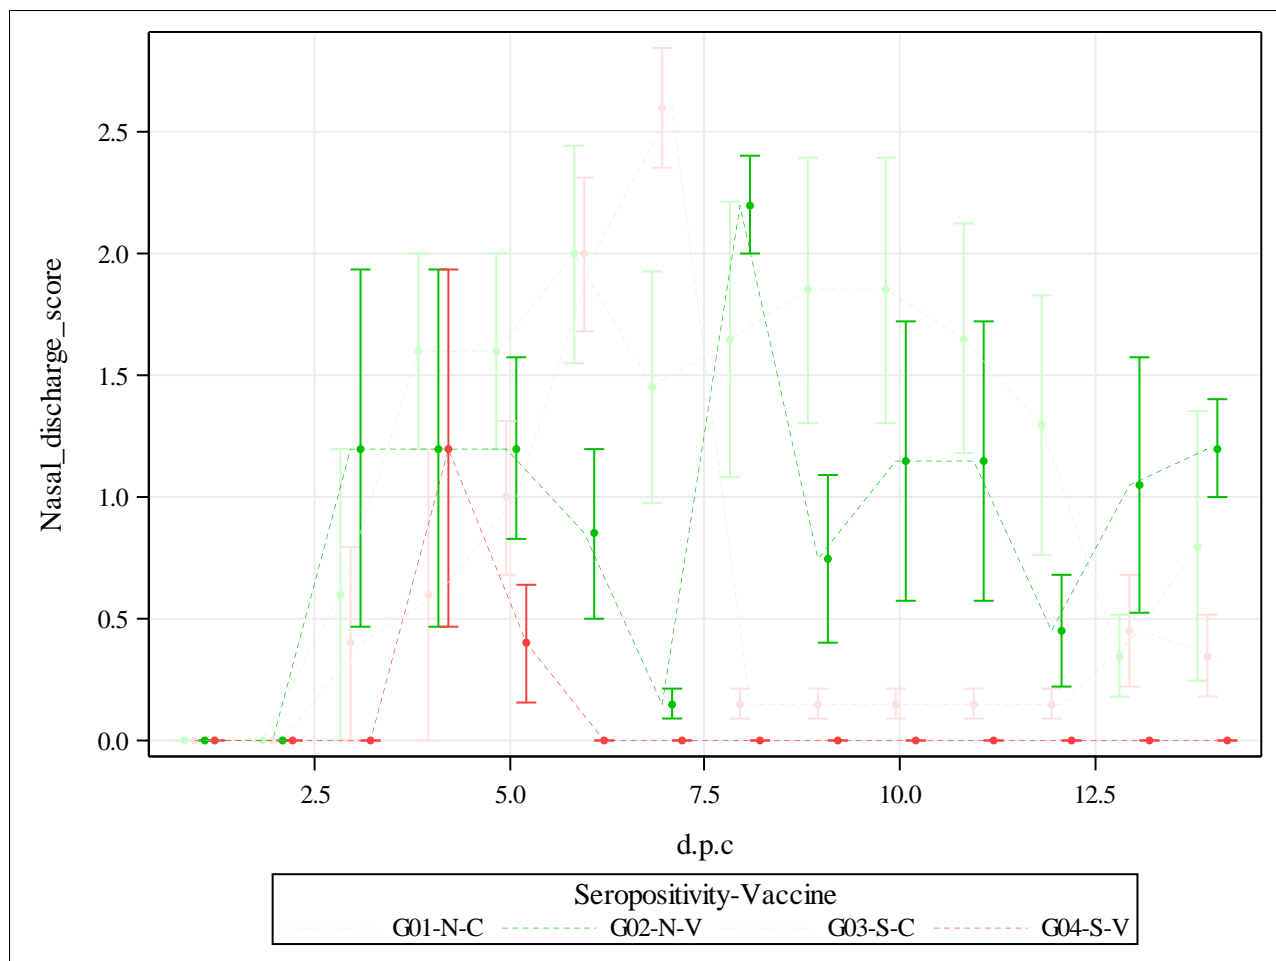



*The Mixed Procedure*

| Model Information         |                       |
|---------------------------|-----------------------|
| Data Set                  | WORK.DATAN0           |
| Dependent Variable        | Nasal_discharge_score |
| Covariance Structure      | Autoregressive        |
| Subject Effect            | CamelID               |
| Estimation Method         | REML                  |
| Residual Variance Method  | Profile               |
| Fixed Effects SE Method   | Model-Based           |
| Degrees of Freedom Method | Between-Within        |

| Class Level Information |        |                                                             |
|-------------------------|--------|-------------------------------------------------------------|
| Class                   | Levels | Values                                                      |
| d_p_c_                  | 14     | 1 2 3 4 5 6 7 8 9 10 11 12 13 14                            |
| CamelID                 | 20     | 11 12 13 14 15 21 22 23 24 25 31 32 33 34 35 41 42 43 44 45 |
| Seropositivity          | 2      | 0 1                                                         |
| Vaccine                 | 2      | 0 1                                                         |

| Dimensions            |    |
|-----------------------|----|
| Covariance Parameters | 2  |
| Columns in X          | 75 |
| Columns in Z          | 0  |
| Subjects              | 20 |
| Max Obs Per Subject   | 14 |

| Number of Observations          |     |
|---------------------------------|-----|
| Number of Observations Read     | 280 |
| Number of Observations Used     | 280 |
| Number of Observations Not Used | 0   |

| Iteration History |             |                 |            |
|-------------------|-------------|-----------------|------------|
| Iteration         | Evaluations | -2 Res Log Like | Criterion  |
| 0                 | 1           | 649.84733028    |            |
| 1                 | 2           | 569.06863698    | 0.00000262 |
| 2                 | 1           | 569.06846431    | 0.00000000 |

*The Mixed Procedure*

|                           |
|---------------------------|
| Convergence criteria met. |
|---------------------------|

**Estimated R Matrix for CamelID 11**

| Row | Col1     | Col2     | Col3     | Col4     | Col5     | Col6     | Col7     | Col8     | Col9     | Col10    | Col11    | Col12    |
|-----|----------|----------|----------|----------|----------|----------|----------|----------|----------|----------|----------|----------|
| 1   | 0.6028   | 0.3195   | 0.1694   | 0.08978  | 0.04759  | 0.02522  | 0.01337  | 0.007087 | 0.003756 | 0.001991 | 0.001055 | 0.000559 |
| 2   | 0.3195   | 0.6028   | 0.3195   | 0.1694   | 0.08978  | 0.04759  | 0.02522  | 0.01337  | 0.007087 | 0.003756 | 0.001991 | 0.001055 |
| 3   | 0.1694   | 0.3195   | 0.6028   | 0.3195   | 0.1694   | 0.08978  | 0.04759  | 0.02522  | 0.01337  | 0.007087 | 0.003756 | 0.001991 |
| 4   | 0.08978  | 0.1694   | 0.3195   | 0.6028   | 0.3195   | 0.1694   | 0.08978  | 0.04759  | 0.02522  | 0.01337  | 0.007087 | 0.003756 |
| 5   | 0.04759  | 0.08978  | 0.1694   | 0.3195   | 0.6028   | 0.3195   | 0.1694   | 0.08978  | 0.04759  | 0.02522  | 0.01337  | 0.007087 |
| 6   | 0.02522  | 0.04759  | 0.08978  | 0.1694   | 0.3195   | 0.6028   | 0.3195   | 0.1694   | 0.08978  | 0.04759  | 0.02522  | 0.01337  |
| 7   | 0.01337  | 0.02522  | 0.04759  | 0.08978  | 0.1694   | 0.3195   | 0.6028   | 0.3195   | 0.1694   | 0.08978  | 0.04759  | 0.02522  |
| 8   | 0.007087 | 0.01337  | 0.02522  | 0.04759  | 0.08978  | 0.1694   | 0.3195   | 0.6028   | 0.3195   | 0.1694   | 0.08978  | 0.04759  |
| 9   | 0.003756 | 0.007087 | 0.01337  | 0.02522  | 0.04759  | 0.08978  | 0.1694   | 0.3195   | 0.6028   | 0.3195   | 0.1694   | 0.08978  |
| 10  | 0.001991 | 0.003756 | 0.007087 | 0.01337  | 0.02522  | 0.04759  | 0.08978  | 0.1694   | 0.3195   | 0.6028   | 0.3195   | 0.1694   |
| 11  | 0.001055 | 0.001991 | 0.003756 | 0.007087 | 0.01337  | 0.02522  | 0.04759  | 0.08978  | 0.1694   | 0.3195   | 0.6028   | 0.3195   |
| 12  | 0.000559 | 0.001055 | 0.001991 | 0.003756 | 0.007087 | 0.01337  | 0.02522  | 0.04759  | 0.08978  | 0.1694   | 0.3195   | 0.6028   |
| 13  | 0.000297 | 0.000559 | 0.001055 | 0.001991 | 0.003756 | 0.007087 | 0.01337  | 0.02522  | 0.04759  | 0.08978  | 0.1694   | 0.3195   |
| 14  | 0.000157 | 0.000297 | 0.000559 | 0.001055 | 0.001991 | 0.003756 | 0.007087 | 0.01337  | 0.02522  | 0.04759  | 0.08978  | 0.1694   |

**Estimated R Matrix for CamelID 11**

| Row | Col13    | Col14    |
|-----|----------|----------|
| 1   | 0.000297 | 0.000157 |
| 2   | 0.000559 | 0.000297 |
| 3   | 0.001055 | 0.000559 |
| 4   | 0.001991 | 0.001055 |
| 5   | 0.003756 | 0.001991 |
| 6   | 0.007087 | 0.003756 |
| 7   | 0.01337  | 0.007087 |
| 8   | 0.02522  | 0.01337  |
| 9   | 0.04759  | 0.02522  |
| 10  | 0.08978  | 0.04759  |
| 11  | 0.1694   | 0.08978  |
| 12  | 0.3195   | 0.1694   |
| 13  | 0.6028   | 0.3195   |
| 14  | 0.3195   | 0.6028   |

*The Mixed Procedure*

| Estimated R Correlation Matrix for CamelID 11 |          |          |          |          |          |          |         |         |          |          |          |          |
|-----------------------------------------------|----------|----------|----------|----------|----------|----------|---------|---------|----------|----------|----------|----------|
| Row                                           | Col1     | Col2     | Col3     | Col4     | Col5     | Col6     | Col7    | Col8    | Col9     | Col10    | Col11    | Col12    |
| 1                                             | 1.0000   | 0.5301   | 0.2810   | 0.1489   | 0.07894  | 0.04184  | 0.02218 | 0.01176 | 0.006231 | 0.003303 | 0.001751 | 0.000928 |
| 2                                             | 0.5301   | 1.0000   | 0.5301   | 0.2810   | 0.1489   | 0.07894  | 0.04184 | 0.02218 | 0.01176  | 0.006231 | 0.003303 | 0.001751 |
| 3                                             | 0.2810   | 0.5301   | 1.0000   | 0.5301   | 0.2810   | 0.1489   | 0.07894 | 0.04184 | 0.02218  | 0.01176  | 0.006231 | 0.003303 |
| 4                                             | 0.1489   | 0.2810   | 0.5301   | 1.0000   | 0.5301   | 0.2810   | 0.1489  | 0.07894 | 0.04184  | 0.02218  | 0.01176  | 0.006231 |
| 5                                             | 0.07894  | 0.1489   | 0.2810   | 0.5301   | 1.0000   | 0.5301   | 0.2810  | 0.1489  | 0.07894  | 0.04184  | 0.02218  | 0.01176  |
| 6                                             | 0.04184  | 0.07894  | 0.1489   | 0.2810   | 0.5301   | 1.0000   | 0.5301  | 0.2810  | 0.1489   | 0.07894  | 0.04184  | 0.02218  |
| 7                                             | 0.02218  | 0.04184  | 0.07894  | 0.1489   | 0.2810   | 0.5301   | 1.0000  | 0.5301  | 0.2810   | 0.1489   | 0.07894  | 0.04184  |
| 8                                             | 0.01176  | 0.02218  | 0.04184  | 0.07894  | 0.1489   | 0.2810   | 0.5301  | 1.0000  | 0.5301   | 0.2810   | 0.1489   | 0.07894  |
| 9                                             | 0.006231 | 0.01176  | 0.02218  | 0.04184  | 0.07894  | 0.1489   | 0.2810  | 0.5301  | 1.0000   | 0.5301   | 0.2810   | 0.1489   |
| 10                                            | 0.003303 | 0.006231 | 0.01176  | 0.02218  | 0.04184  | 0.07894  | 0.1489  | 0.2810  | 0.5301   | 1.0000   | 0.5301   | 0.2810   |
| 11                                            | 0.001751 | 0.003303 | 0.006231 | 0.01176  | 0.02218  | 0.04184  | 0.07894 | 0.1489  | 0.2810   | 0.5301   | 1.0000   | 0.5301   |
| 12                                            | 0.000928 | 0.001751 | 0.003303 | 0.006231 | 0.01176  | 0.02218  | 0.04184 | 0.07894 | 0.1489   | 0.2810   | 0.5301   | 1.0000   |
| 13                                            | 0.000492 | 0.000928 | 0.001751 | 0.003303 | 0.006231 | 0.01176  | 0.02218 | 0.04184 | 0.07894  | 0.1489   | 0.2810   | 0.5301   |
| 14                                            | 0.000261 | 0.000492 | 0.000928 | 0.001751 | 0.003303 | 0.006231 | 0.01176 | 0.02218 | 0.04184  | 0.07894  | 0.1489   | 0.2810   |

| Estimated R Correlation Matrix for CamelID 11 |          |          |
|-----------------------------------------------|----------|----------|
| Row                                           | Col13    | Col14    |
| 1                                             | 0.000492 | 0.000261 |
| 2                                             | 0.000928 | 0.000492 |
| 3                                             | 0.001751 | 0.000928 |
| 4                                             | 0.003303 | 0.001751 |
| 5                                             | 0.006231 | 0.003303 |
| 6                                             | 0.01176  | 0.006231 |
| 7                                             | 0.02218  | 0.01176  |
| 8                                             | 0.04184  | 0.02218  |
| 9                                             | 0.07894  | 0.04184  |
| 10                                            | 0.1489   | 0.07894  |
| 11                                            | 0.2810   | 0.1489   |
| 12                                            | 0.5301   | 0.2810   |
| 13                                            | 1.0000   | 0.5301   |
| 14                                            | 0.5301   | 1.0000   |

*The Mixed Procedure*

| Covariance Parameter Estimates |         |          |
|--------------------------------|---------|----------|
| Cov Parm                       | Subject | Estimate |
| AR(1)                          | CamelID | 0.5301   |
| Residual                       |         | 0.6028   |

| Fit Statistics           |       |
|--------------------------|-------|
| -2 Res Log Likelihood    | 569.1 |
| AIC (smaller is better)  | 573.1 |
| AICC (smaller is better) | 573.1 |
| BIC (smaller is better)  | 575.1 |

| Null Model Likelihood Ratio Test |            |            |
|----------------------------------|------------|------------|
| DF                               | Chi-Square | Pr > ChiSq |
| 1                                | 80.78      | <.0001     |

| Solution for Fixed Effects |        |                |         |          |                |     |         |         |
|----------------------------|--------|----------------|---------|----------|----------------|-----|---------|---------|
| Effect                     | d_p_c_ | Seropositivity | Vaccine | Estimate | Standard Error | DF  | t Value | Pr >  t |
| Intercept                  |        |                |         | 0.1875   | 0.3007         | 17  | 0.62    | 0.5412  |
| d_p_c_                     | 1      |                |         | -0.1875  | 0.4252         | 221 | -0.44   | 0.6597  |
| d_p_c_                     | 2      |                |         | -0.1875  | 0.4252         | 221 | -0.44   | 0.6596  |
| d_p_c_                     | 3      |                |         | 0.06250  | 0.4251         | 221 | 0.15    | 0.8832  |
| d_p_c_                     | 4      |                |         | 0.7625   | 0.4249         | 221 | 1.79    | 0.0741  |
| d_p_c_                     | 5      |                |         | 0.2625   | 0.4246         | 221 | 0.62    | 0.5370  |
| d_p_c_                     | 6      |                |         | 0.02500  | 0.4239         | 221 | 0.06    | 0.9530  |
| d_p_c_                     | 7      |                |         | 0.1375   | 0.4228         | 221 | 0.33    | 0.7453  |
| d_p_c_                     | 8      |                |         | -0.01250 | 0.4205         | 221 | -0.03   | 0.9763  |
| d_p_c_                     | 9      |                |         | -0.4250  | 0.4163         | 221 | -1.02   | 0.3084  |
| d_p_c_                     | 10     |                |         | -0.3250  | 0.4081         | 221 | -0.80   | 0.4267  |
| d_p_c_                     | 11     |                |         | -0.2750  | 0.3923         | 221 | -0.70   | 0.4841  |
| d_p_c_                     | 12     |                |         | -0.3625  | 0.3606         | 221 | -1.01   | 0.3159  |
| d_p_c_                     | 13     |                |         | 0.1000   | 0.2915         | 221 | 0.34    | 0.7319  |
| d_p_c_                     | 14     |                |         | 0        | .              | .   | .       | .       |
| Seropositivity             |        | 0              |         | 0.8250   | 0.3472         | 17  | 2.38    | 0.0295  |



*The Mixed Procedure*

| Solution for Fixed Effects |        |                |         |          |                |     |         |         |
|----------------------------|--------|----------------|---------|----------|----------------|-----|---------|---------|
| Effect                     | d_p_c_ | Seropositivity | Vaccine | Estimate | Standard Error | DF  | t Value | Pr >  t |
| Seropositivity             |        | 1              |         | 0        | .              | .   | .       | .       |
| Vaccine                    |        |                | 0       | -0.02500 | 0.3472         | 17  | -0.07   | 0.9434  |
| Vaccine                    |        |                | 1       | 0        | .              | .   | .       | .       |
| d_p_c_*Seropositivit       | 1      | 0              |         | -0.8250  | 0.4910         | 221 | -1.68   | 0.0943  |
| d_p_c_*Seropositivit       | 1      | 1              |         | 0        | .              | .   | .       | .       |
| d_p_c_*Seropositivit       | 2      | 0              |         | -0.8250  | 0.4909         | 221 | -1.68   | 0.0943  |
| d_p_c_*Seropositivit       | 2      | 1              |         | 0        | .              | .   | .       | .       |
| d_p_c_*Seropositivit       | 3      | 0              |         | -0.1250  | 0.4908         | 221 | -0.25   | 0.7992  |
| d_p_c_*Seropositivit       | 3      | 1              |         | 0        | .              | .   | .       | .       |
| d_p_c_*Seropositivit       | 4      | 0              |         | -0.3250  | 0.4906         | 221 | -0.66   | 0.5084  |
| d_p_c_*Seropositivit       | 4      | 1              |         | 0        | .              | .   | .       | .       |
| d_p_c_*Seropositivit       | 5      | 0              |         | -0.1250  | 0.4902         | 221 | -0.25   | 0.7990  |
| d_p_c_*Seropositivit       | 5      | 1              |         | 0        | .              | .   | .       | .       |
| d_p_c_*Seropositivit       | 6      | 0              |         | -0.4000  | 0.4895         | 221 | -0.82   | 0.4147  |
| d_p_c_*Seropositivit       | 6      | 1              |         | 0        | .              | .   | .       | .       |
| d_p_c_*Seropositivit       | 7      | 0              |         | -1.3250  | 0.4882         | 221 | -2.71   | 0.0072  |
| d_p_c_*Seropositivit       | 7      | 1              |         | 0        | .              | .   | .       | .       |
| d_p_c_*Seropositivit       | 8      | 0              |         | 1.0250   | 0.4856         | 221 | 2.11    | 0.0359  |
| d_p_c_*Seropositivit       | 8      | 1              |         | 0        | .              | .   | .       | .       |
| d_p_c_*Seropositivit       | 9      | 0              |         | 0.4000   | 0.4807         | 221 | 0.83    | 0.4062  |
| d_p_c_*Seropositivit       | 9      | 1              |         | 0        | .              | .   | .       | .       |
| d_p_c_*Seropositivit       | 10     | 0              |         | 0.6000   | 0.4713         | 221 | 1.27    | 0.2043  |
| d_p_c_*Seropositivit       | 10     | 1              |         | 0        | .              | .   | .       | .       |
| d_p_c_*Seropositivit       | 11     | 0              |         | 0.5000   | 0.4530         | 221 | 1.10    | 0.2709  |
| d_p_c_*Seropositivit       | 11     | 1              |         | 0        | .              | .   | .       | .       |
| d_p_c_*Seropositivit       | 12     | 0              |         | -0.02500 | 0.4164         | 221 | -0.06   | 0.9522  |
| d_p_c_*Seropositivit       | 12     | 1              |         | 0        | .              | .   | .       | .       |
| d_p_c_*Seropositivit       | 13     | 0              |         | -0.3500  | 0.3366         | 221 | -1.04   | 0.2996  |
| d_p_c_*Seropositivit       | 13     | 1              |         | 0        | .              | .   | .       | .       |
| d_p_c_*Seropositivit       | 14     | 0              |         | 0        | .              | .   | .       | .       |
| d_p_c_*Seropositivit       | 14     | 1              |         | 0        | .              | .   | .       | .       |
| d_p_c_*Vaccine             | 1      |                | 0       | 0.02500  | 0.4910         | 221 | 0.05    | 0.9594  |
| d_p_c_*Vaccine             | 1      |                | 1       | 0        | .              | .   | .       | .       |
| d_p_c_*Vaccine             | 2      |                | 0       | 0.02500  | 0.4909         | 221 | 0.05    | 0.9594  |

*The Mixed Procedure*

| Solution for Fixed Effects |        |                |         |          |                |     |         |         |
|----------------------------|--------|----------------|---------|----------|----------------|-----|---------|---------|
| Effect                     | d_p_c_ | Seropositivity | Vaccine | Estimate | Standard Error | DF  | t Value | Pr >  t |
| d_p_c_*Vaccine             | 2      |                | 1       | 0        | .              | .   | .       | .       |
| d_p_c_*Vaccine             | 3      |                | 0       | -0.07500 | 0.4908         | 221 | -0.15   | 0.8787  |
| d_p_c_*Vaccine             | 3      |                | 1       | 0        | .              | .   | .       | .       |
| d_p_c_*Vaccine             | 4      |                | 0       | -0.07500 | 0.4906         | 221 | -0.15   | 0.8786  |
| d_p_c_*Vaccine             | 4      |                | 1       | 0        | .              | .   | .       | .       |
| d_p_c_*Vaccine             | 5      |                | 0       | 0.5250   | 0.4902         | 221 | 1.07    | 0.2854  |
| d_p_c_*Vaccine             | 5      |                | 1       | 0        | .              | .   | .       | .       |
| d_p_c_*Vaccine             | 6      |                | 0       | 1.6000   | 0.4895         | 221 | 3.27    | 0.0013  |
| d_p_c_*Vaccine             | 6      |                | 1       | 0        | .              | .   | .       | .       |
| d_p_c_*Vaccine             | 7      |                | 0       | 1.9750   | 0.4882         | 221 | 4.05    | <.0001  |
| d_p_c_*Vaccine             | 7      |                | 1       | 0        | .              | .   | .       | .       |
| d_p_c_*Vaccine             | 8      |                | 0       | -0.1750  | 0.4856         | 221 | -0.36   | 0.7189  |
| d_p_c_*Vaccine             | 8      |                | 1       | 0        | .              | .   | .       | .       |
| d_p_c_*Vaccine             | 9      |                | 0       | 0.6500   | 0.4807         | 221 | 1.35    | 0.1777  |
| d_p_c_*Vaccine             | 9      |                | 1       | 0        | .              | .   | .       | .       |
| d_p_c_*Vaccine             | 10     |                | 0       | 0.4500   | 0.4713         | 221 | 0.95    | 0.3407  |
| d_p_c_*Vaccine             | 10     |                | 1       | 0        | .              | .   | .       | .       |
| d_p_c_*Vaccine             | 11     |                | 0       | 0.3500   | 0.4530         | 221 | 0.77    | 0.4406  |
| d_p_c_*Vaccine             | 11     |                | 1       | 0        | .              | .   | .       | .       |
| d_p_c_*Vaccine             | 12     |                | 0       | 0.5250   | 0.4164         | 221 | 1.26    | 0.2087  |
| d_p_c_*Vaccine             | 12     |                | 1       | 0        | .              | .   | .       | .       |
| d_p_c_*Vaccine             | 13     |                | 0       | -0.1000  | 0.3366         | 221 | -0.30   | 0.7667  |
| d_p_c_*Vaccine             | 13     |                | 1       | 0        | .              | .   | .       | .       |
| d_p_c_*Vaccine             | 14     |                | 0       | 0        | .              | .   | .       | .       |
| d_p_c_*Vaccine             | 14     |                | 1       | 0        | .              | .   | .       | .       |

| Type 3 Tests of Fixed Effects |        |        |         |        |
|-------------------------------|--------|--------|---------|--------|
| Effect                        | Num DF | Den DF | F Value | Pr > F |
| d_p_c_                        | 13     | 221    | 3.65    | <.0001 |
| Seropositivity                | 1      | 17     | 19.33   | 0.0004 |
| Vaccine                       | 1      | 17     | 5.82    | 0.0274 |
| d_p_c_*Seropositivit          | 13     | 221    | 4.86    | <.0001 |
| d_p_c_*Vaccine                | 13     | 221    | 4.64    | <.0001 |

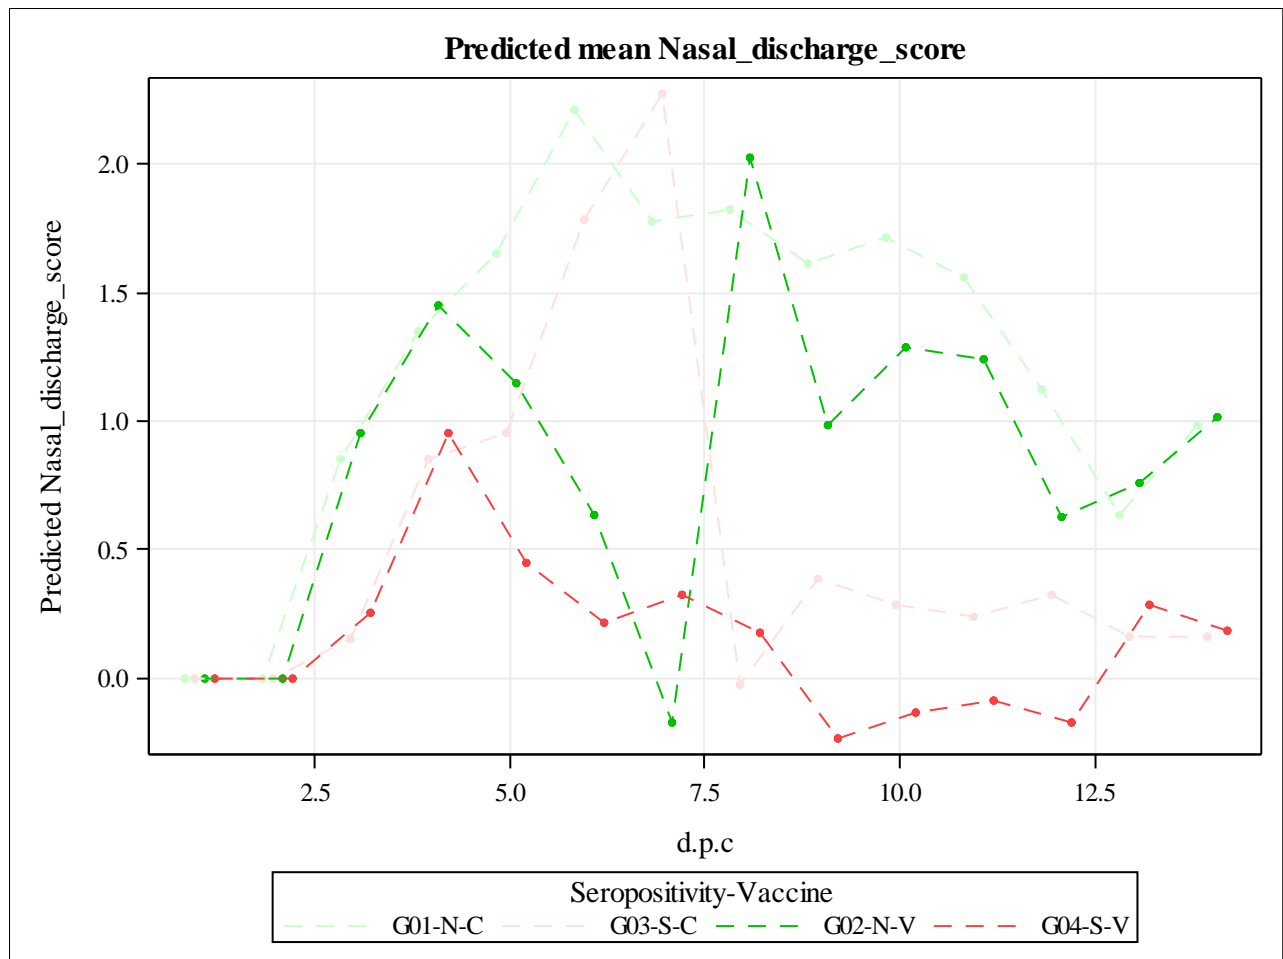

*Predicted mean Nasal\_discharge\_score**The MEANS Procedure*

| Analysis Variable : areaRect |       |            |
|------------------------------|-------|------------|
| CamelID                      | N Obs | Sum        |
| 11                           | 14    | 11.6250000 |
| 12                           | 14    | 14.3750000 |
| 13                           | 14    | 29.1250000 |
| 14                           | 14    | 21.7500000 |
| 15                           | 14    | 4.6250000  |
| 21                           | 14    | 8.7500000  |
| 22                           | 14    | 23.5000000 |
| 23                           | 14    | 17.0000000 |
| 24                           | 14    | 4.7500000  |
| 25                           | 14    | 5.7500000  |
| 31                           | 14    | 4.3750000  |
| 32                           | 14    | 8.0000000  |
| 33                           | 14    | 7.7500000  |
| 34                           | 14    | 12.3750000 |
| 35                           | 14    | 7.3750000  |
| 41                           | 14    | 0          |
| 42                           | 14    | 0          |
| 43                           | 14    | 4.0000000  |
| 44                           | 14    | 0          |
| 45                           | 14    | 4.0000000  |

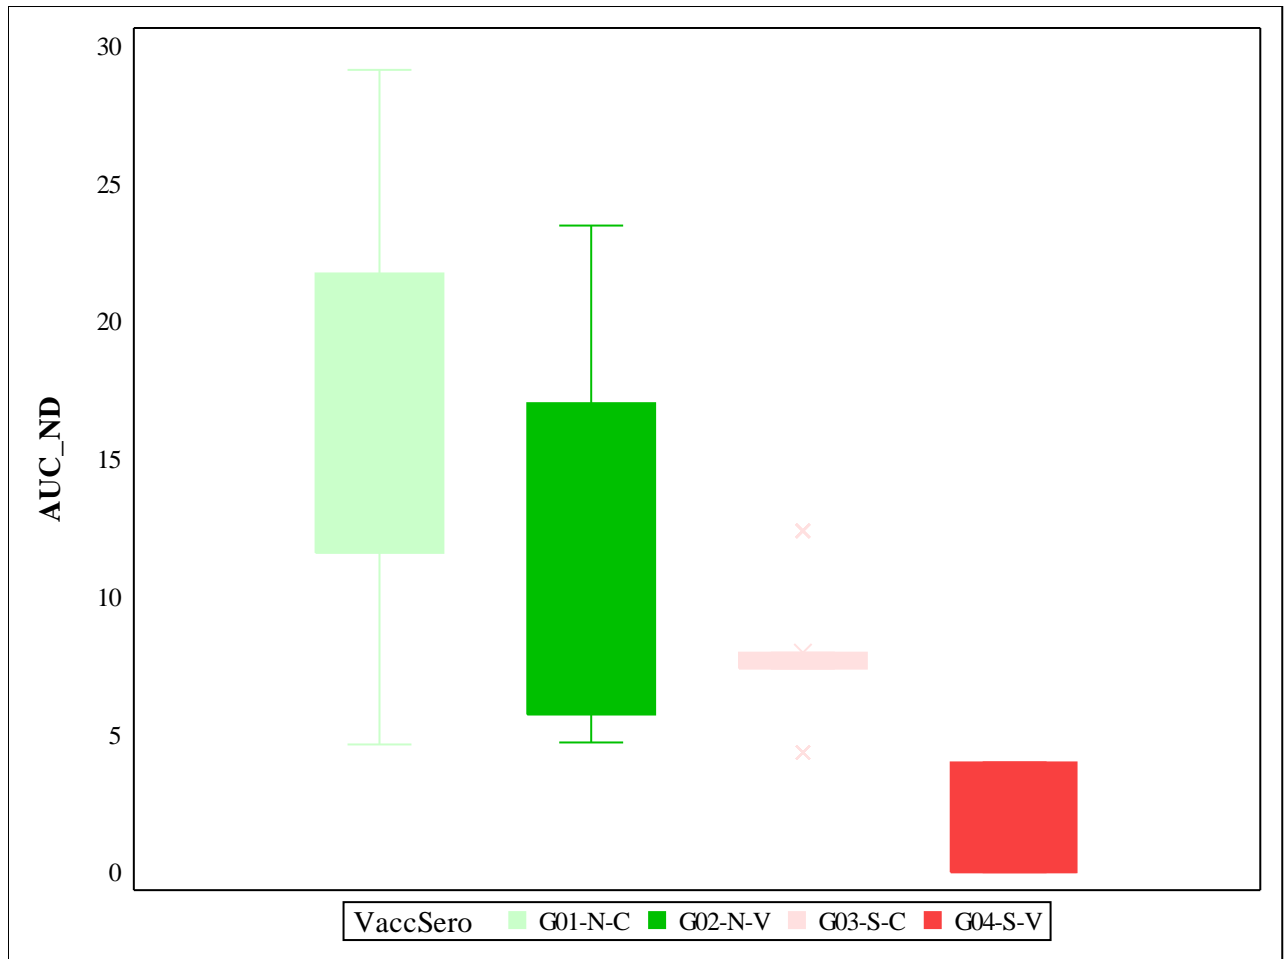

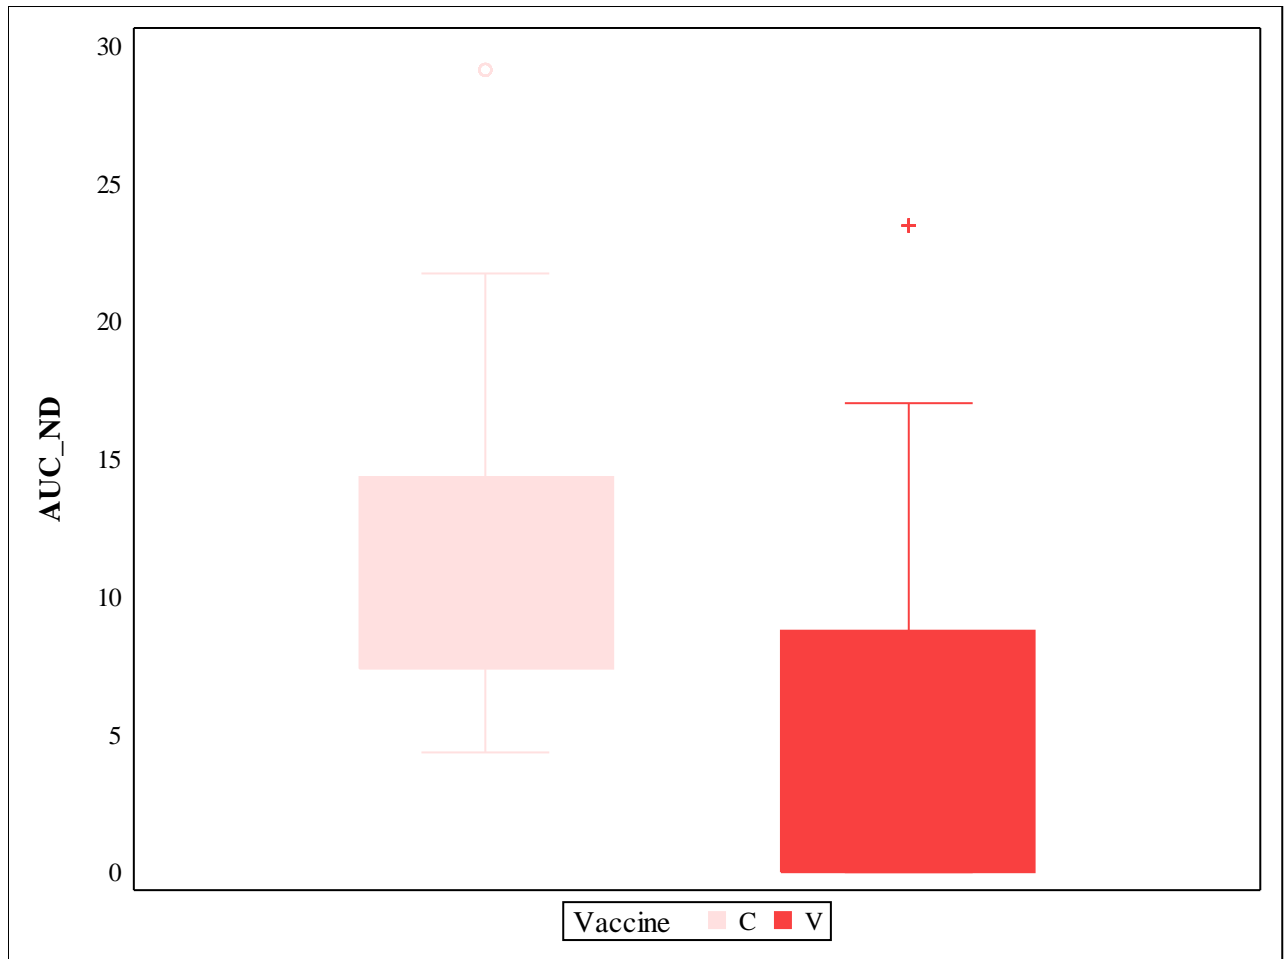

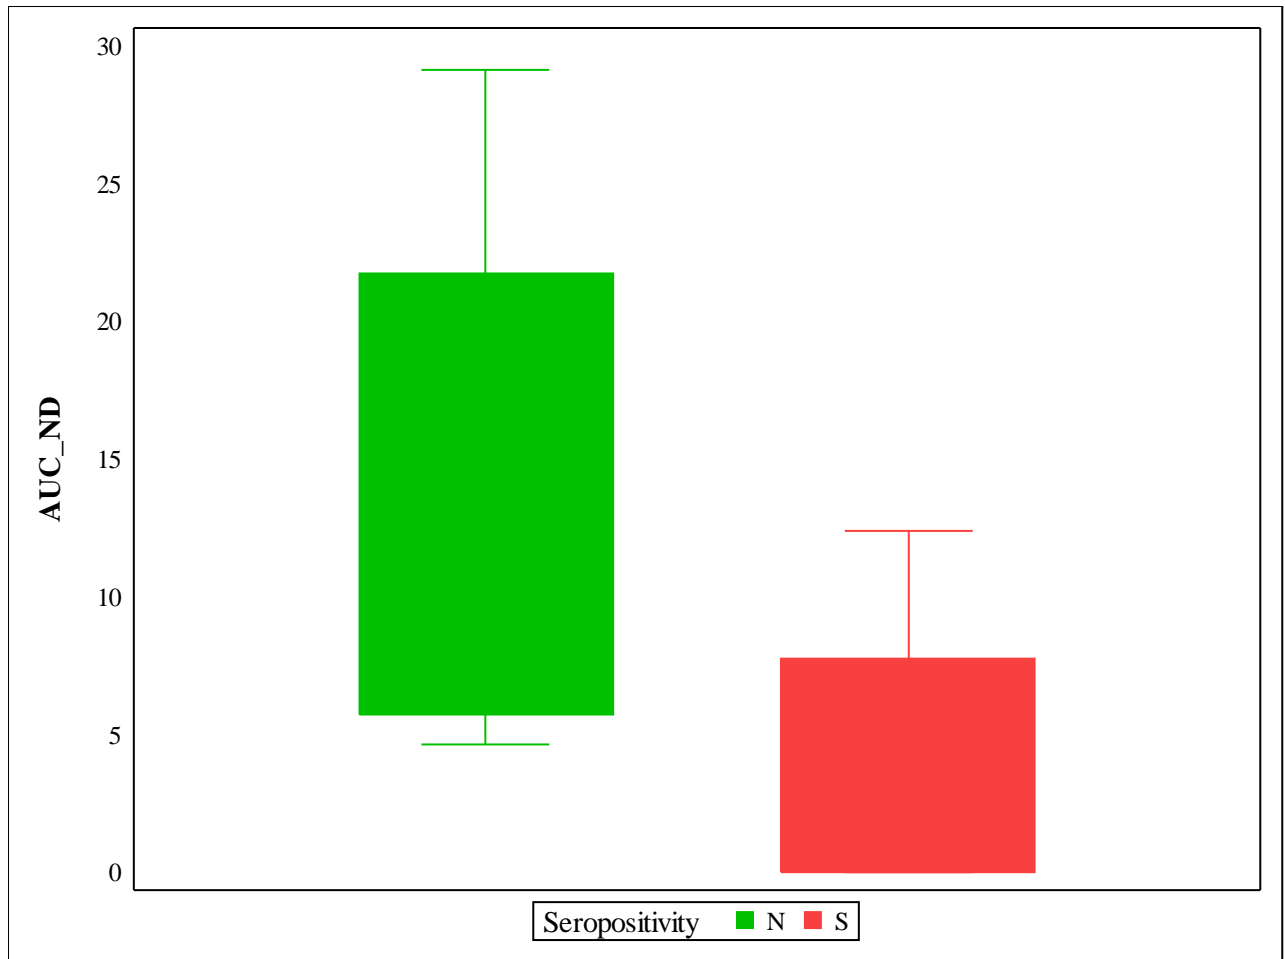

*The GLM Procedure*

| <b>Class Level Information</b> |               |               |
|--------------------------------|---------------|---------------|
| <b>Class</b>                   | <b>Levels</b> | <b>Values</b> |
| <b>Seropositivity</b>          | 2             | N S           |
| <b>Vaccine</b>                 | 2             | C V           |

|                                    |    |
|------------------------------------|----|
| <b>Number of Observations Read</b> | 20 |
| <b>Number of Observations Used</b> | 20 |



*The GLM Procedure**Dependent Variable: AUC\_VT*

| Source                 | DF | Sum of Squares | Mean Square | F Value | Pr > F |
|------------------------|----|----------------|-------------|---------|--------|
| <b>Model</b>           | 3  | 22279.06791    | 7426.35597  | 87.97   | <.0001 |
| <b>Error</b>           | 16 | 1350.65958     | 84.41622    |         |        |
| <b>Corrected Total</b> | 19 | 23629.72749    |             |         |        |

| R-Square | Coeff Var | Root MSE | AUC_VT Mean |
|----------|-----------|----------|-------------|
| 0.942841 | 14.17659  | 9.187830 | 64.80987    |

| Source                        | DF | Type I SS   | Mean Square | F Value | Pr > F        |
|-------------------------------|----|-------------|-------------|---------|---------------|
| <b>Seropositivity</b>         | 1  | 21732.58209 | 21732.58209 | 257.45  | <.0001        |
| <b>Vaccine</b>                | 1  | 533.73977   | 533.73977   | 6.32    | <b>0.0230</b> |
| <b>Seropositivity*Vaccine</b> | 1  | 12.74605    | 12.74605    | 0.15    | 0.7027        |

| Source                        | DF | Type III SS | Mean Square | F Value | Pr > F |
|-------------------------------|----|-------------|-------------|---------|--------|
| <b>Seropositivity</b>         | 1  | 21732.58209 | 21732.58209 | 257.45  | <.0001 |
| <b>Vaccine</b>                | 1  | 533.73977   | 533.73977   | 6.32    | 0.0230 |
| <b>Seropositivity*Vaccine</b> | 1  | 12.74605    | 12.74605    | 0.15    | 0.7027 |

The GLM Procedure

Dependent Variable: AUC\_VT

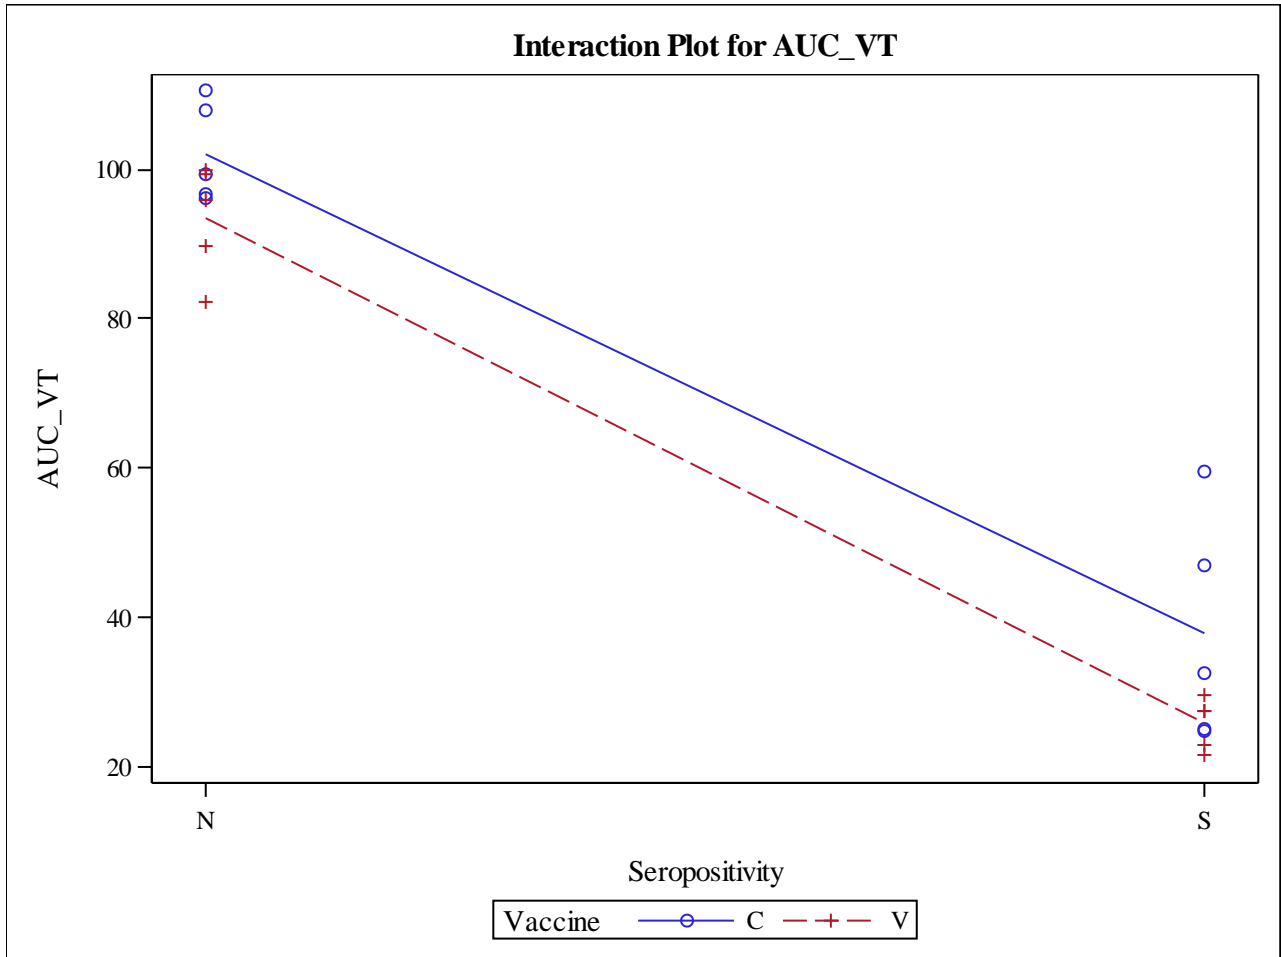

*The GLM Procedure*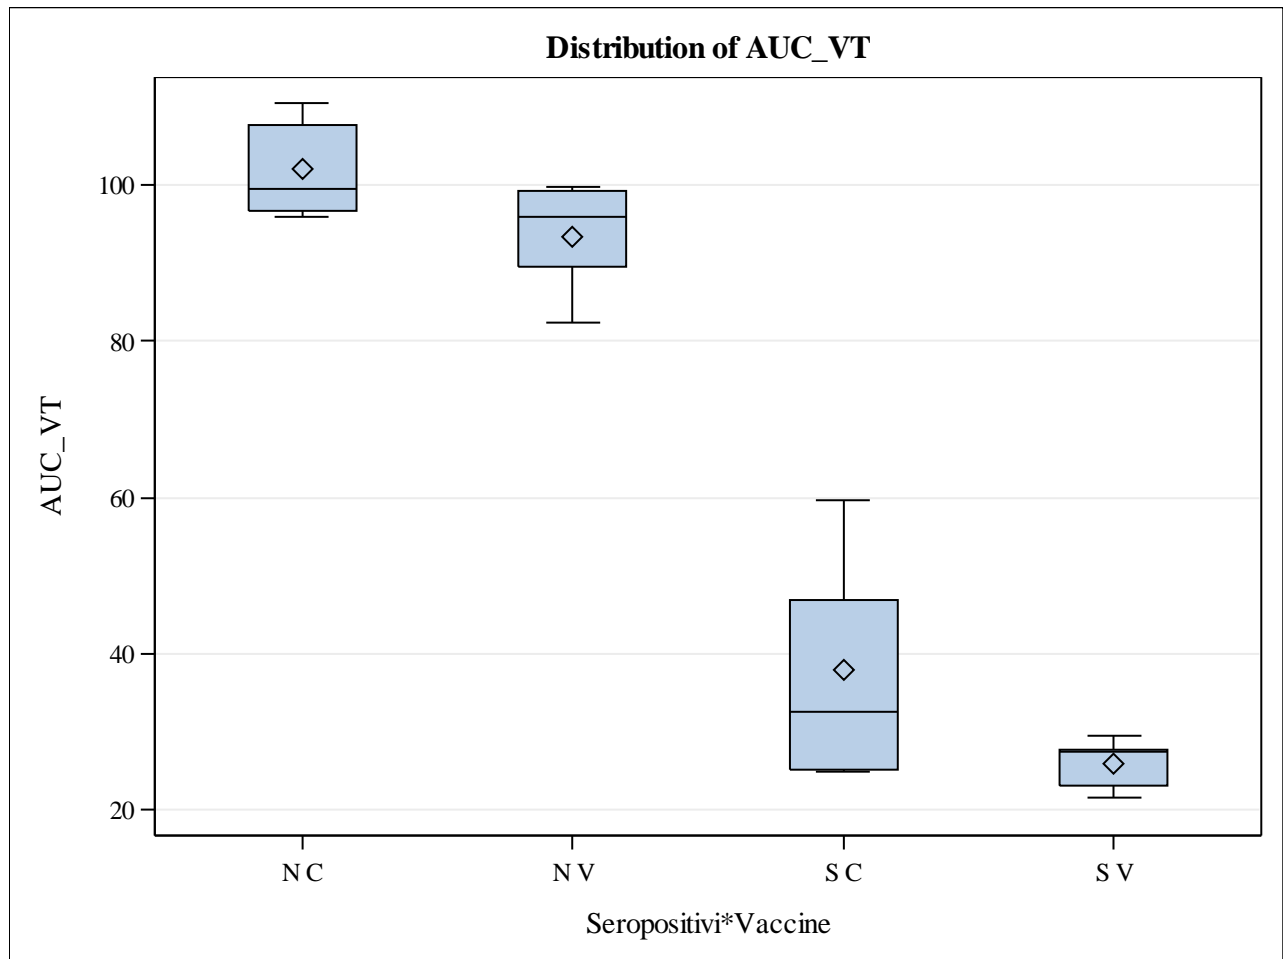

| Level of Seropositivity | Level of Vaccine | N | AUC_VT     |            |
|-------------------------|------------------|---|------------|------------|
|                         |                  |   | Mean       | Std Dev    |
| N                       | C                | 5 | 102.141559 | 6.6424966  |
| N                       | V                | 5 | 93.406293  | 7.3982536  |
| S                       | C                | 5 | 37.810067  | 15.0820632 |
| S                       | V                | 5 | 25.881553  | 3.3673947  |

*The GLM Procedure*

| Class Level Information |        |        |
|-------------------------|--------|--------|
| Class                   | Levels | Values |
| Seropositivity          | 2      | N S    |
| Vaccine                 | 2      | C V    |

|                             |    |
|-----------------------------|----|
| Number of Observations Read | 20 |
| Number of Observations Used | 20 |

*The GLM Procedure*

| Source                 | DF | Sum of Squares | Mean Square | F Value | Pr > F |
|------------------------|----|----------------|-------------|---------|--------|
| <b>Model</b>           | 3  | 584.852344     | 194.950781  | 4.67    | 0.0157 |
| <b>Error</b>           | 16 | 667.406250     | 41.712891   |         |        |
| <b>Corrected Total</b> | 19 | 1252.258594    |             |         |        |

| R-Square | Coeff Var | Root MSE | AUC_ND Mean |
|----------|-----------|----------|-------------|
| 0.467038 | 68.29929  | 6.458552 | 9.456250    |

| Source                        | DF | Type I SS   | Mean Square | F Value | Pr > F |
|-------------------------------|----|-------------|-------------|---------|--------|
| <b>Seropositivity</b>         | 1  | 435.9445313 | 435.9445313 | 10.45   | 0.0052 |
| <b>Vaccine</b>                | 1  | 143.7820313 | 143.7820313 | 3.45    | 0.0819 |
| <b>Seropositivity*Vaccine</b> | 1  | 5.1257813   | 5.1257813   | 0.12    | 0.7305 |

| Source                        | DF | Type III SS | Mean Square | F Value | Pr > F |
|-------------------------------|----|-------------|-------------|---------|--------|
| <b>Seropositivity</b>         | 1  | 435.9445313 | 435.9445313 | 10.45   | 0.0052 |
| <b>Vaccine</b>                | 1  | 143.7820313 | 143.7820313 | 3.45    | 0.0819 |
| <b>Seropositivity*Vaccine</b> | 1  | 5.1257813   | 5.1257813   | 0.12    | 0.7305 |

*The GLM Procedure*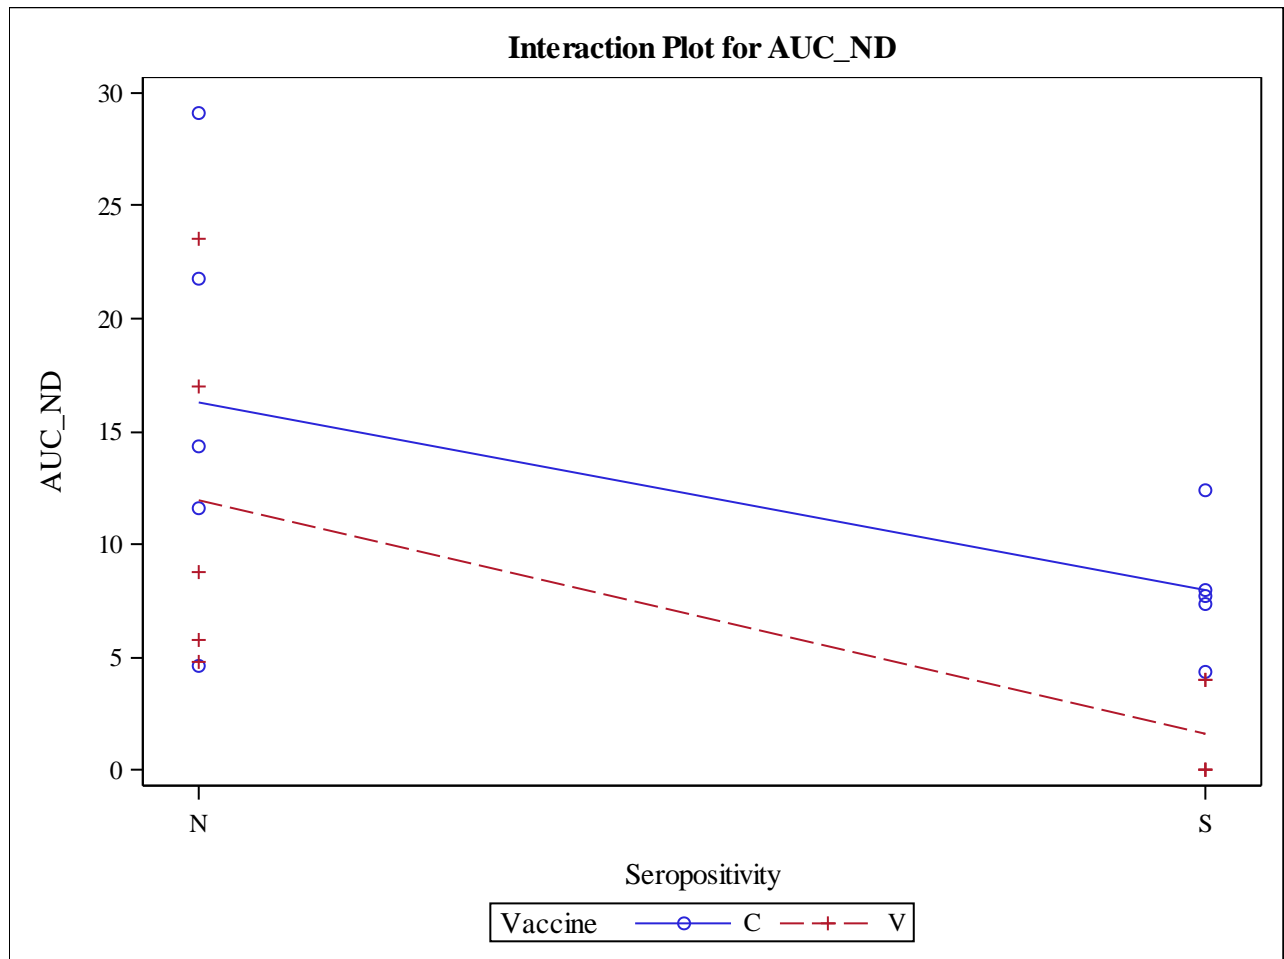

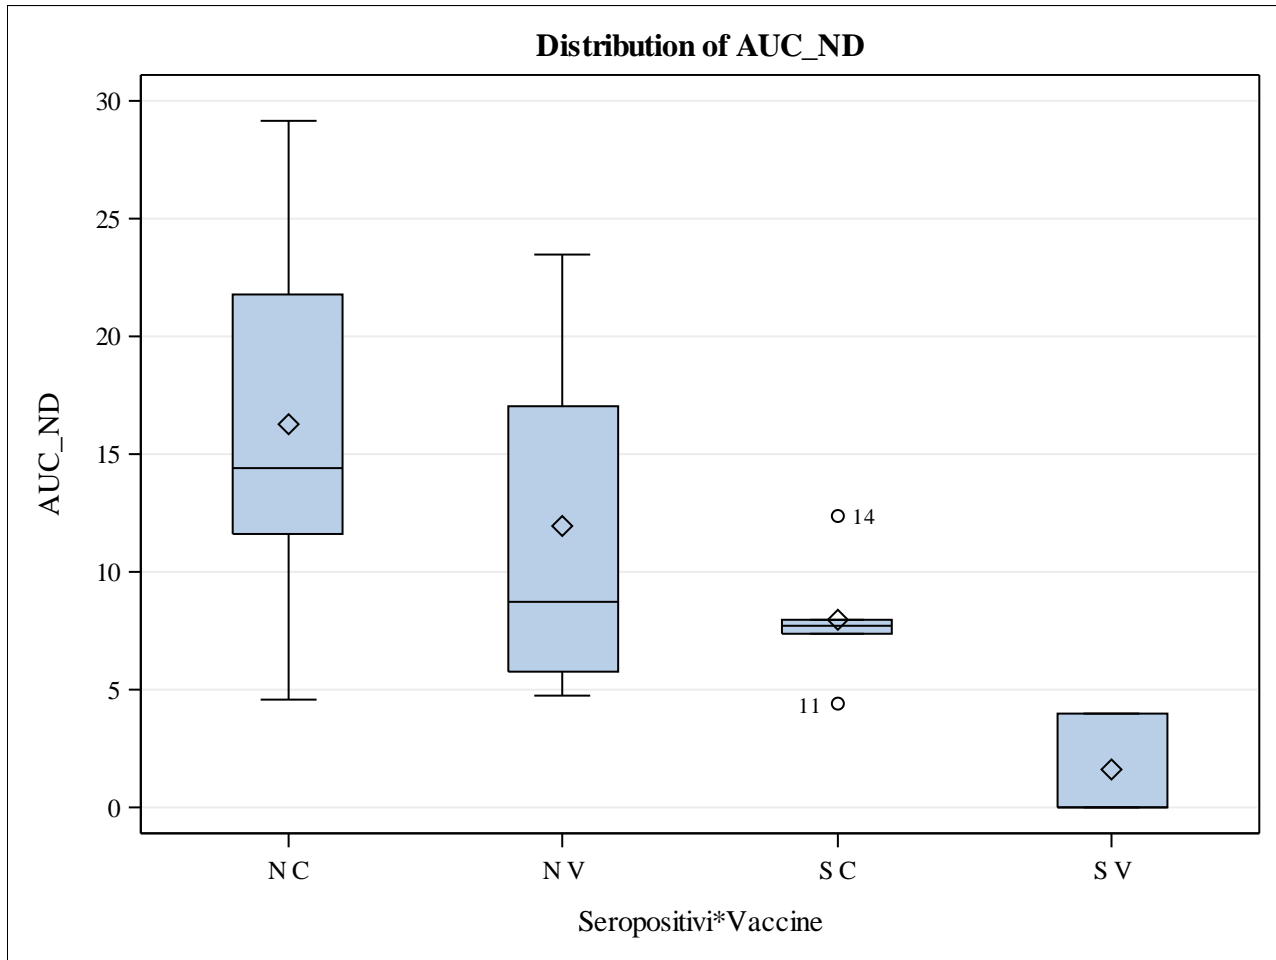

| Level of Seropositivity | Level of Vaccine | N | AUC_ND     |            |
|-------------------------|------------------|---|------------|------------|
|                         |                  |   | Mean       | Std Dev    |
| N                       | C                | 5 | 16.3000000 | 9.43464361 |
| N                       | V                | 5 | 11.9500000 | 8.05333782 |
| S                       | C                | 5 | 7.9750000  | 2.86056157 |
| S                       | V                | 5 | 1.6000000  | 2.19089023 |

Table 1: Cohen's  $f^2$  the effect size of virus titre post challenge by grouping factors and day post challenge.

| Cohen's $f^2$ | Grouping factor | Day post challenge |
|---------------|-----------------|--------------------|
| 0.128         | Seropositivity  | 1                  |
| 1.714         | Seropositivity  | 2                  |
| 4.055         | Seropositivity  | 3                  |
| 11.069        | Seropositivity  | 4                  |
| 4.787         | Seropositivity  | 5                  |
| 9.636         | Seropositivity  | 6                  |
| 8.912         | Seropositivity  | 7                  |
| 1.805         | Seropositivity  | 8                  |
| 1.623         | Seropositivity  | 9                  |
| 2.916         | Seropositivity  | 10                 |
| 0.826         | Seropositivity  | 11                 |
| 2.957         | Seropositivity  | 12                 |
| 0.621         | Seropositivity  | 13                 |
| 0.002         | Seropositivity  | 14                 |
| 0.321         | Vaccine         | 1                  |
| 0.186         | Vaccine         | 2                  |
| 0.013         | Vaccine         | 3                  |
| 0.018         | Vaccine         | 4                  |
| 0.364         | Vaccine         | 5                  |
| 0.324         | Vaccine         | 6                  |
| 0.446         | Vaccine         | 7                  |
| 0.165         | Vaccine         | 8                  |
| 0.315         | Vaccine         | 9                  |
| 0.060         | Vaccine         | 10                 |
| 0.341         | Vaccine         | 11                 |
| 0.827         | Vaccine         | 12                 |
| 0.016         | Vaccine         | 13                 |
| 0.001         | Vaccine         | 14                 |

Table 2: Cohen's  $f^2$  the effect size of nasal discharge score by grouping factors and day post challenge

| Cohen's $f^2$ | Grouping factor | Day post challenge |
|---------------|-----------------|--------------------|
|               | Seropositivity  | 1                  |
|               | Seropositivity  | 2                  |
| 0.109         | Seropositivity  | 3                  |
| 0.038         | Seropositivity  | 4                  |
| 0.265         | Seropositivity  | 5                  |
| 0.097         | Seropositivity  | 6                  |



## The GLM Procedure

01:39 Saturday, September 07, 2019 49

|       |                |    |
|-------|----------------|----|
| 0.157 | Seropositivity | 7  |
| 2.156 | Seropositivity | 8  |
| 0.787 | Seropositivity | 9  |
| 0.782 | Seropositivity | 10 |
| 0.780 | Seropositivity | 11 |
| 0.432 | Seropositivity | 12 |
| 0.128 | Seropositivity | 13 |
| 0.419 | Seropositivity | 14 |
| <hr/> |                |    |
|       | Vaccine        | 1  |
|       | Vaccine        | 2  |
| 0.002 | Vaccine        | 3  |
| 0.002 | Vaccine        | 4  |
| 0.135 | Vaccine        | 5  |
| 1.326 | Vaccine        | 6  |
| 2.395 | Vaccine        | 7  |
| 0.025 | Vaccine        | 8  |
| 0.205 | Vaccine        | 9  |
| 0.070 | Vaccine        | 10 |
| 0.047 | Vaccine        | 11 |
| 0.169 | Vaccine        | 12 |
| 0.009 | Vaccine        | 13 |
| 0.000 | Vaccine        | 14 |
| <hr/> |                |    |

Cohen's  $f^2$  is used to measure the practical significance of our test, we report the local effect size Cohen's  $f^2$  for repeated-measures[1].

### Reference:

- 1- Selya, A. S., Rose, J. S., Dierker, L. C., Hedeker, D., & Mermelstein, R. J. (2012). A Practical Guide to Calculating Cohen's  $f(2)$ , a Measure of Local Effect Size, from PROC MIXED. *Frontiers in psychology*, 3, 111. doi:10.3389/fpsyg.2012.00111
